# Supplementary material for: Evaluation of stereochemically dense morpholine-based scaffolds as proline surrogates in β-turn peptides
Source: Royal Society of Chemistry journal article supplement (doi:10.1039/b913444a), 2009-12-14
Supplement: b913444a.pdf [file b913444a.pdf]

## Evaluation of stereochemically dense morpholine-based scaffolds as proline surrogates in $\beta$ -turn peptides

Filippo Sladojevich, Antonio Guarna, and Andrea Trabocchi\*

*Department of Organic Chemistry “Ugo Schiff”, University of Florence, Polo Scientifico e Tecnologico, Via della Lastruccia 13, I-50019 Sesto Fiorentino (FI), Italy. Fax: +39 055 4573531; Tel: +39 055 4573507; E-mail: andrea.trabocchi@unifi.it*

### ELECTRONIC SUPPLEMENTARY INFORMATION

|                                                                                                                                     |         |
|-------------------------------------------------------------------------------------------------------------------------------------|---------|
| <b>Fig. S1:</b> NOe irradiation of H-6 of compound <b>1a</b> at 4.44 ppm                                                            | S2      |
| Experimental procedures and characterization data for H-Gly-D-Leu-D-Val-OMe, <b>9a-c</b> and <b>10a-c</b>                           | S2-S6   |
| <b>Table S1:</b> $^1\text{H}$ chemical shift data for peptides <b>I – IV</b> in $\text{CDCl}_3$ and $\text{CD}_3\text{CN}$          | S7      |
| <b>Table S2:</b> $^{13}\text{C}$ chemical shift data for peptides <b>I – IV</b> in $\text{CDCl}_3$ and $\text{CD}_3\text{CN}$       | S8      |
| <b>Table S3:</b> ROESY data in $\text{CD}_3\text{CN}$ for compounds <b>I – IV</b>                                                   | S9      |
| $^1\text{H}$ and $^{13}\text{C}$ NMR spectra of compounds <b>1 – 11</b>                                                             | S10-S26 |
| $^1\text{H}$ in $\text{CD}_3\text{CN}$ , $^1\text{H}$ in $\text{CDCl}_3$ , TOCSY, ROESY and gHSQC spectra of peptides <b>I – IV</b> | S27-S42 |
| Computational data for model scaffolds <b>I-IV</b>                                                                                  | S43-S45 |

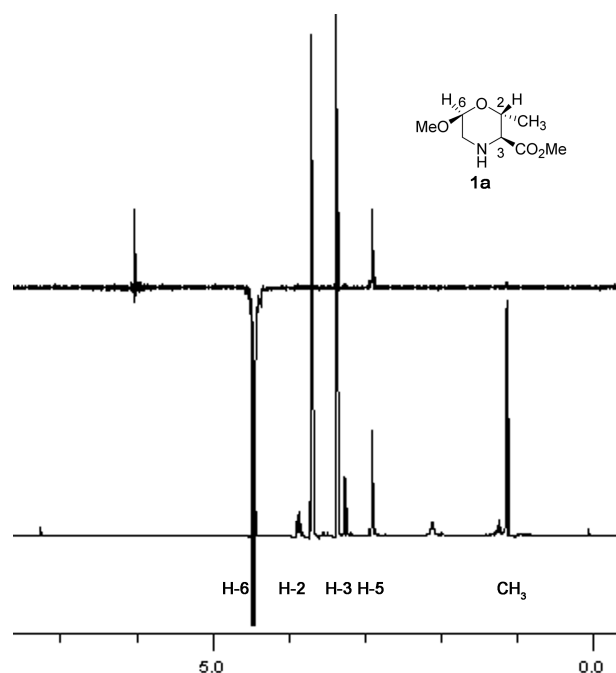

**Fig. S1** NOe irradiation of H-6 of compound **1a** at 4.44 ppm (NOESY1D, mixing time of 500 ms): the nOe correlations between H-6 and H-2 are not present.

**H-Gly-D-Leu-D-Val-OMe.** Peptide H-Gly-D-Leu-D-Val-OMe was prepared using standard protocols for solution phase peptide synthesis using Boc-glycine Boc-D-leucine and D-valine methyl ester hydrochlorides as starting materials.  $\delta_{\text{H}}$  (400 MHz, DMSO- $d_6$ ) 8.47 (d,  $J = 8.0$  Hz, 1H, NH), 8.32 (d,  $J = 8.0$  Hz, 1 H, NH), 8.02 (br, 3 H), 4.49 (q,  $J = 8.0$  Hz, 1 H, D-Leu H- $\alpha$ ), 4.11 (t,  $J = 7.2$  Hz, 1 H, D-Val H- $\alpha$ ), 3.59 (s, 3 H, OCH<sub>3</sub>), 2.60 (m, 2 H, Gly H- $\alpha$ ), 2.01 (septet,  $J = 7.2$  Hz, 1 H, D-Val H- $\beta$ ), 1.59 (septet,  $J = 6.8$  Hz, 1 H, D-Leu H- $\gamma$ ), 1.41 (t,  $J = 6.8$  Hz, 2 H, D-Leu H- $\beta$ ), 0.88-0.84 (m, 12 H, D-Leu H- $\delta$  and D-Val H- $\gamma$ ).

**H-Mor-Gly-D-Leu-D-Val-OMe (9a).** Tripeptide H-Gly-D-Leu-D-Val-OMe (125 mg, 0.30 mmol) was suspended in CH<sub>2</sub>Cl<sub>2</sub> (3 mL) and DIPEA (177  $\mu$ L, 1.10 mmol) was added. The mixture was stirred until a clear solution was obtained, and Fmoc-amino acid **8** (100 mg, 0.27 mmol) and TBTU (96 mg, 0.30 mmol) were sequentially added. The reaction mixture was stirred 4 hours at room temperature and then CH<sub>2</sub>Cl<sub>2</sub> was evaporated. The resultant oil was dissolved in EtOAc, washed with 1M HCl, 5% Na<sub>2</sub>CO<sub>3</sub>, brine and dried over anhydrous Na<sub>2</sub>SO<sub>4</sub>. The solution was filtered and concentrated to dryness to yield a solid that was treated with a 30% Et<sub>2</sub>NH in CH<sub>3</sub>CN (3 mL). The Fmoc deprotection was monitored by

TLC. When complete conversion was obtained, volatiles were removed under reduced pressure and the residue was eluted over silica gel (Et<sub>2</sub>O/MeOH 30:1 to pure MeOH) to yield amine **9a** as a white solid (110 mg, 95%). (Found: C, 56.18; H, 8.55; N, 12.98. C<sub>20</sub>H<sub>36</sub>N<sub>4</sub>O<sub>6</sub> requires C, 56.06; H, 8.47; N, 13.07%). [ $\alpha$ ]<sub>D</sub><sup>21</sup> = -44.6 (c 0.5, CHCl<sub>3</sub>);  $\delta$ <sub>H</sub> (400 MHz, CDCl<sub>3</sub>) 7.50 (br, 1 H, NH), 6.63 (br, 1 H, NH), 6.45 (d, *J* = 8.4 Hz, 1 H, NH), 4.53-4.43 (m, 2 H), 3.92 (dd, *J* = 15.6, 5.6 Hz, 1 H), 3.88-3.79 (m, 2 H), 3.73 (s, 3 H, OCH<sub>3</sub>), 3.63 (t, *J* = 12.0 Hz, 1 H), 3.45 (m, 1 H), 3.17 (d, *J* = 8.0 Hz, 1 H), 2.97 (t, *J* = 12.0 Hz, 1 H), 2.1 (m, 1 H, D-Val H- $\beta$ ), 1.83 (br, 1 H, H-4), 1.55 (m, 2 H, D-Leu H- $\beta$ ), 1.53 (t, *J* = 8.0 Hz, 1 H, D-Leu H- $\gamma$ ), 1.23 (d, *J* = 5.6 Hz, 3 H, CH<sub>3</sub>-C-2), 0.95-0.85 (m, 12 H, D-Leu H- $\delta$  and D-Val H- $\gamma$ );  $\delta$ <sub>C</sub> (60 MHz, CDCl<sub>3</sub>) 172.2 (s, CO), 172.1 (s, CO), 171.9 (s, CO), 168.7 (s, CO<sub>2</sub>Me), 74.8, (d), 67.3 (t), 65.4 (d, C-2), 57.2 (d), 52.1 (d), 51.9 (q, OCH<sub>3</sub>), 44.2 (t), 42.6 (t), 41.2 (t), 31.1 (d), 24.6 (d), 22.8 (q, CH<sub>3</sub>), 22.0 (q, CH<sub>3</sub>), 18.9 (q, CH<sub>3</sub>), 18.3 (q, CH<sub>3</sub>), 17.9 (q, CH<sub>3</sub>). ESI-MSMS *m/z* 429.47 (M<sup>+</sup>+1, 16), 397.19 (M<sup>+</sup>-OMe, 28), 298.11 [M<sup>+</sup>-(D-Val<sub>2</sub>OMe), 100].

**H-[(6*S*)-methoxy]-Mor-Gly-D-Leu-D-Val-OMe (9b).** Tripeptide H-Gly-D-Leu-D-Val-OMe (120 mg, 0.29 mmol) was suspended in CH<sub>2</sub>Cl<sub>2</sub> (3 mL) and DIPEA (181  $\mu$ L, 1.06 mmol) was added. The mixture was stirred until a clear solution was obtained, then **4** (105 mg, 0.26 mmol) and TBTU (93 mg, 0.29 mmol) were sequentially added. The reaction mixture was stirred 4 hours at room temperature, then CH<sub>2</sub>Cl<sub>2</sub> was evaporated. The resultant oil was dissolved in EtOAc, washed with 1M HCl, 5% Na<sub>2</sub>CO<sub>3</sub>, brine and dried over anhydrous Na<sub>2</sub>SO<sub>4</sub>. The solution was filtered and concentrated to dryness to yield a solid that was treated with 30% Et<sub>2</sub>NH in CH<sub>3</sub>CN (3 mL). The Fmoc deprotection was monitored by TLC, and after complete conversion was obtained, volatiles were removed under reduced pressure and the residue was eluted over silica gel (Et<sub>2</sub>O/MeOH 30:1 to pure MeOH) to yield amine **9b** as a white solid (114 mg, 96%). (Found: C, 55.12; H, 8.42; N, 12.13. C<sub>21</sub>H<sub>38</sub>N<sub>4</sub>O<sub>7</sub> requires C, 55.00; H, 8.35; N, 12.22%). [ $\alpha$ ]<sub>D</sub><sup>21</sup> = +46.0 (c 1.24, CH<sub>2</sub>Cl<sub>2</sub>);  $\delta$ <sub>H</sub> (400 MHz, CDCl<sub>3</sub>) 7.33 (t, *J* = 6.0 Hz, 1H, NH), 6.55 (d, *J* = 8.4 Hz, 1 H, NH), 6.44 (d, *J* = 8.8 Hz, 1 H, NH), 4.55 (s, 1 H, H-6), 4.50 (dd, *J* = 8.8, 4.0 Hz, 1 H), 4.46-4.41 (m, 1 H), 3.98 (dd, *J* = 16.0, 6.0 Hz, 1 H), 3.91 (m, 1 H), 3.84 (dd, *J* = 16.0, 6.0 Hz, 1 H), 3.73 (s, 3 H, CO<sub>2</sub>CH<sub>3</sub>), 3.39 (s, 3 H, OCH<sub>3</sub>), 3.13 (d, *J* = 9.6 Hz, 1 H), 2.96 (dd, *J* = 13.2, 3.6 Hz, 1 H), 2.89 (d, *J* = 13.2 Hz, 1 H), 2.10 (m 1 H, D-Val H- $\beta$ ), 1.71 (br, 1 H, H-4), 1.69-1.61 (m, 2 H, D-Leu H- $\beta$ ), 1.55-1.50 (m, 1 H, D-Leu H- $\gamma$ ), 1.25 (d, *J* = 6.4 Hz, 3 H, CH<sub>3</sub>-C-2), 0.94-0.88 (m, 12 H, D-Leu H- $\delta$  and D-Val H- $\gamma$ );  $\delta$ <sub>C</sub> (60 MHz, CDCl<sub>3</sub>) 172.0 (s, CO), 171.8 (s, CO), 171.4 (s, CO), 168.5 (s, CO<sub>2</sub>Me), 95.9 (d, C-6), 65.7 (t), 65.7 (d), 64.3 (d), 57.2 (d), 54.5 (q, OCH<sub>3</sub>), 52.1 (d), 51.9 (d), 47.2 (t), 42.8 (t), 41.3

(t), 31.1 (d), 24.7 (d), 22.8 (q), 22.2 (q), 19.0 (q), 18.5 (q), 17.9 (q). ESI-MSMS  $m/z$  459.46 ( $M^+ + 1$ , 67), 427.00 ( $M^+ - \text{OMe}$ , 100), 322.23 [ $M^+ - (\text{OMe})\text{Mor} + \text{Na}$ , 100].

**H-[(6R)-methoxy]-Mor-Gly-D-Leu-D-Val-OMe (9c).** Tripeptide H-Gly-D-Leu-D-Val-OMe (120 mg, 0.29 mmol) was suspended in  $\text{CH}_2\text{Cl}_2$  (3 mL) and DIPEA (181  $\mu\text{L}$ , 1.06 mmol) was added. The mixture was stirred until a clear solution was obtained and Fmoc-amino acid **5** (105 mg, 0.26 mmol) and TBTU (93 mg, 0.29 mmol) were sequentially added. The reaction mixture was stirred 4 hours at room temperature and then  $\text{CH}_2\text{Cl}_2$  was evaporated. The resultant oil was dissolved in EtOAc, washed with 1M HCl, 5%  $\text{Na}_2\text{CO}_3$ , brine and dried over anhydrous  $\text{Na}_2\text{SO}_4$ . The solution was filtered and concentrated to dryness to yield a solid that was treated with 30%  $\text{Et}_2\text{NH}$  in  $\text{CH}_3\text{CN}$  (3 mL). The Fmoc deprotection was monitored by TLC. When complete conversion was obtained, volatiles were removed under reduced pressure and the residue was eluted over silica gel ( $\text{Et}_2\text{O}/\text{MeOH}$  30:1 to pure MeOH) to yield amine **9c** as a white solid (90 mg, 75%). (Found: C, 55.07; H, 8.39; N, 12.17.  $\text{C}_{21}\text{H}_{38}\text{N}_4\text{O}_7$  requires C, 55.00; H, 8.35; N, 12.22%).  $[\alpha]_{\text{D}}^{20} = -36.5$  (c 0.84,  $\text{CH}_2\text{Cl}_2$ );  $\delta_{\text{H}}$  (400 MHz,  $\text{CDCl}_3$ ) 7.34 (t,  $J = 7.2$  Hz, 1 H, Gly NH), 6.54 (d,  $J = 12.4$ , 1 H, D-Leu NH), 6.39 (d,  $J = 12.4$ , 1 H, D-Val NH), 4.51 (dd,  $J = 8.7$ , 4.8 Hz, 1 H, D-Val H- $\alpha$ ), 4.46-4.43 (m, 2 H, D-Leu H- $\alpha$  + H-6), 4.01 (dd,  $J = 15.9$ , 6.1, 1 H, Gly H- $\alpha$ ), 3.81 (dd,  $J = 15.9$ , 5.5 Hz, 1, Gly H- $\alpha$ ), 3.72 (s, 3 H,  $\text{CO}_2\text{CH}_3$ ), 3.61 (dq,  $J = 8.8$ , 6.2 Hz, 1 H, H-2), 3.50 (s, 3 H,  $\text{OCH}_3$ ), 3.08 (d,  $J = 8.8$  Hz, 1 H, H-3), 3.03 (dd,  $J = 11.7$ , 2.4 Hz, 1 H, H-5), 2.61 (dd,  $J = 11.6$ , 8.5, Hz, 1 H, H-5), 2.15 (m, 1 H, D-Val H- $\beta$ ), 1.66 (m, 3 H, D-Leu H- $\beta/\gamma$ ), 1.29 (d,  $J = 6.3$  Hz, 3 H,  $\text{CH}_3\text{-C-2}$ ), 0.95-0.88 (m, 12 H, D-Leu H- $\delta$  and D-Val H- $\gamma$ ).  $\delta_{\text{C}}$  (50 MHz,  $\text{CDCl}_3$ ) 172.2 (s, CO), 172.0 (s, CO), 171.4 (s, CO), 168.4 (s,  $\text{CO}_2\text{Me}$ ), 100.4 (d, C-6), 74.8, (d), 73.8 (d), 64.1 (d), 57.1 (d), 56.1 (q,  $\text{OCH}_3$ ), 52.2 (d), 51.8 (d), 48.0 (t), 42.6 (t), 41.5 (t), 31.2 (d), 24.7 (d), 22.8 (q,  $\text{CH}_3$ ), 22.2 (q,  $\text{CH}_3$ ), 19.0 (q,  $\text{CH}_3$ ), 18.1 (q,  $\text{CH}_3$ ), 18.0 (q,  $\text{CH}_3$ ). ESI-MSMS  $m/z$  481.85 ( $M^+ + \text{Na}$ , 14), 449.33 ( $M^+ - \text{OMe} + \text{Na}$ , 93), 322.23 [ $M^+ - (\text{OMe})\text{Mor} + \text{Na}$ , 100].

**H-D-Val-Mor-Gly-D-Leu-D-Val-OMe (10a).** 2,6-Lutidine (112  $\mu\text{L}$ , 0.96 mmol) was added to a solution of peptide **9a** (135 mg, 0.32 mmol) in  $\text{CH}_2\text{Cl}_2$  (3 mL). Solid Fmoc-D-Val-Cl (114 mg, 0.32 mmol) was added in small portions. The reaction mixture was stirred at room temperature for 3 hours and dichloromethane was then removed under reduced pressure. The resultant oil was dissolved in EtOAc, washed with 1M HCl, 5%  $\text{Na}_2\text{CO}_3$ , brine and dried over anhydrous  $\text{Na}_2\text{SO}_4$ . The solution was filtered and concentrated to dryness to yield a solid that was treated with 30%  $\text{Et}_2\text{NH}$  in  $\text{CH}_3\text{CN}$  (3 mL). The Fmoc deprotection was monitored by TLC, until complete conversion was obtained, then volatiles were removed under reduced pressure and the residue was eluted over silica gel ( $\text{Et}_2\text{O}/\text{MeOH}$  30:1 to

pure MeOH) to yield amine **10a** as a white solid (140 mg, 83%). (Found: C, 56.99; H, 8.56; N, 13.21.  $C_{25}H_{45}N_5O_7$  requires C, 56.91; H, 8.60; N, 13.27%).  $[\alpha]_D^{21} = +10.5$  (c 1.00,  $CHCl_3$ );  $\delta_H$  (400 MHz,  $CDCl_3$ ) 7.15 (d,  $J = 7.6$  Hz, 1H, NH), 7.06 (br, 1 H, NH), 6.55 (d,  $J = 8.4$  Hz, 1 H, NH), 4.85 (m, 2 H), 4.34 (m, 1 H), 4.28 (d,  $J = 5.6$  Hz, 1 H), 3.97 (d,  $J = 6.0$  Hz, 2 H), 4.0-3.82 (m, 1 H), 3.80-3.62 (m, 2 H), 3.73 (s, 3H,  $CO_2CH_3$ ), 3.63-3.57 (m, 1 H), 3.50 (d,  $J = 6.4$  Hz, 1 H), 2.17-2.04 (m, 1 H), 1.97-1.82 (m, 4 H), 1.68-1.65 (m, 2 H), 1.32 (d,  $J = 6.4$  Hz, 3 H), 1.02-0.88 (m, 18 H, D-Leu H- $\delta$  and D-Val H- $\gamma$ ).  $\delta_C$  (60 MHz,  $CDCl_3$ )  $\delta$  176.3 (s, CO), 171.9 (s, CO), 171.8 (s, CO), 169.6 (s, CO), 169.1 (s,  $\underline{CO_2Me}$ ), 69.3 (d), 61.1 (d), 59.9 (d), 57.3 (d), 56.6 (q,  $OCH_3$ ), 52.1 (d), 52.0 (d), 43.1 (t), 42.5 (t), 40.3 (t), 31.8 (q,  $CH_3$ ), 31.1 (d), 24.7 (d), 23.0 (q,  $CH_3$ ), 22.0 (q,  $CH_3$ ), 20.0 (q,  $CH_3$ ), 19.0 (q,  $CH_3$ ), 17.9 (q,  $CH_3$ ), 17.1 (q,  $CH_3$ ). ESI-MSMS  $m/z$  527.52 ( $M^+$ , 18), 496 (18,  $M^+-OMe$ ), 397.07 ( $M^+-D-Val_2OMe$ , 78), 269.25 [ $M^+-(D-Val_2OMe)-(C=O)$ , 35], 284.15 [ $M^+-(D-Leu-D-Val_2OMe)$ , 4], 227.04 [ $M^+-(Gly-D-Leu-D-Val_2OMe)$ , 100].

**H-D-Val-[(6S)-methoxy]-Mor-Gly-D-Leu-D-Val-OMe (10b).** 2,6-Lutidine (85  $\mu$ L, 0.73 mmol) was added to a solution of peptide **9b** (118 mg, 0.24 mmol) in  $CH_2Cl_2$  (3 mL). Solid Fmoc-D-Val-Cl (86 mg, 0.24 mmol) was added in small portions. The reaction mixture was stirred at room temperature for 4 hours and dichloromethane was then removed under reduced pressure. The resultant oil was dissolved in EtOAc, washed with 1M HCl, 5%  $Na_2CO_3$ , brine and dried over anhydrous  $Na_2SO_4$ . The solution was filtered and concentrated to dryness to yield a solid that was treated with 30%  $Et_2NH$  in  $CH_3CN$  (3 mL). The Fmoc deprotection was monitored by TLC. When complete conversion was obtained, volatiles were removed under reduced pressure and the residue was eluted over silica gel ( $Et_2O/MeOH$  30:1 to pure MeOH) to yield amine **10b** as a white solid (114 mg, 85%). (Found: C, 56.21; H, 8.61; N, 12.45.  $C_{26}H_{47}N_5O_8$  requires C, 56.00; H, 8.49; N, 12.56%).  $[\alpha]_D^{21} = +7.5$  (c 5.50,  $CH_3CN$ );  $\delta_H$  (400 MHz,  $CDCl_3$ ) 7.11 (d,  $J = 7.6$  Hz, 2 H, NH), 6.56 (d,  $J = 8.8$  Hz, 1 H, NH), 4.81 (dd,  $J = 7.6, 5.6$  Hz, 1 H, H-6), 4.42 (m, 2 H), 4.31 (dt,  $J = 16.0, 6.4$  Hz, 1 H), 4.05 (dd,  $J = 18.0, 9.6$  Hz, 2 H), 3.98 (dd,  $J = 14.0, 5.6$  Hz, 1 H), 3.85 (dd,  $J = 17.2, 6.0$  Hz, 1 H), 3.71 (s, 3 H,  $CO_2CH_3$ ), 3.53 (d,  $J = 5.6$  Hz, 1 H), 3.42 (dd,  $J = 14.4, 8.4$  Hz, 1 H), 3.41 (s, 3 H,  $CO_2CH_3$ ), 2.07 (septet,  $J = 6.8$  Hz, 1 H), 1.98 (br, 2 H,  $NH_2$ ), 1.89 (septet,  $J = 6.4$  Hz, 1 H), 1.67 (d,  $J = 6.4$ , 2 H, D-Leu H- $\beta$ ), 1.35 (d,  $J = 6.4$  Hz, 3 H,  $CH_3-C-2$ ), 0.99-0.86 (m, 18 H, D-Leu H- $\delta$  and D-Val H- $\gamma$ ).  $\delta_C$  (60 MHz,  $CDCl_3$ ) 175.3 (s, CO), 171.8 (s, CO), 171.7 (s, CO), 169.4 (s, CO), 169.0 (s,  $\underline{CO_2Me}$ ), 97.2 (d, C-6), 63.9 (d), 63.0 (d), 57.3 (d), 56.4 (d), 55.0 (q,  $OCH_3$ ), 52.0 (d), 51.7 (d), 44.1 (t), 42.9 (t), 40.0 (t), 31.8 (q,  $CH_3$ ), 30.9 (d), 24.6 (d), 23.0 (q,  $CH_3$ ), 22.0

(q, CH<sub>3</sub>), 19.9 (q, CH<sub>3</sub>), 19.0 (q, CH<sub>3</sub>), 17.8 (q, CH<sub>3</sub>), 17.0 (q, CH<sub>3</sub>). ESI-MSMS  $m/z$  557.92 ( $M^+ + 1$ , 10), 526.23 ( $M^+ - OMe + 1$ , 100).

**H-D-Val-[(6*R*)-methoxy]-Mor-Gly-D-Leu-D-Val-OMe (10c).** 2,6-Lutidine (85  $\mu$ L, 0.57 mmol) was added to a solution of peptide 9c (80 mg, 0.16 mmol) in CH<sub>2</sub>Cl<sub>2</sub> (3 mL). Solid Fmoc-D-Val-Cl (57 mg, 0.16 mmol) was added in small portions. The reaction mixture was stirred at room temperature for 4 hours and dichloromethane was then removed under reduced pressure. The resultant oil was dissolved in EtOAc, washed with 1M HCl, 5% Na<sub>2</sub>CO<sub>3</sub>, brine and dried over anhydrous Na<sub>2</sub>SO<sub>4</sub>. The solution was filtered and concentrated to dryness to yield a solid that was treated with 30% Et<sub>2</sub>NH in CH<sub>3</sub>CN (3 mL). The Fmoc deprotection was monitored by TLC. When complete conversion was obtained, volatiles were removed under reduced pressure and the residue was eluted over silica gel (Et<sub>2</sub>O/MeOH 30:1 to pure MeOH) to yield amine 10c as a white solid (87 mg, 98%). (Found: C, 56.13; H, 8.53; N, 12.51. C<sub>26</sub>H<sub>47</sub>N<sub>5</sub>O<sub>8</sub> requires C, 56.00; H, 8.49; N, 12.56%).  $[\alpha]_D^{21} = +2.3$  (c 1.0, CH<sub>3</sub>CN); <sup>1</sup>H-NMR (400 MHz, CDCl<sub>3</sub>)  $\delta$  7.49 (d,  $J = 7.2$  Hz, 1 H, NH), 6.71 (br, 1 H, NH), 4.80 (t,  $J = 2.8$  Hz, 1 H, H-6), 4.45-4.39 (m, 2 H), 4.2 (q,  $J = 6.4$  Hz, 1 H), 4.12 (d,  $J = 8.4$  Hz, 1 H), 4.08 (d,  $J = 7.2$  Hz, 1 H), 3.80 (dd,  $J = 17.2, 5.2$  Hz, 1 H), 3.75-3.67 (m, 2 H), 3.71 (s, 3 H, CO<sub>2</sub>CH<sub>3</sub>), 3.42 (s, 3 H, CO<sub>2</sub>CH<sub>3</sub>), 3.37 (d,  $J = 6.4$  Hz, 1 H), 2.14 (septet,  $J = 6.8$  Hz, 1 H), 2.04 (septet,  $J = 6.0$  Hz, 1 H), 1.71 (br, 2 H, NH<sub>2</sub>), 1.32 (d,  $J = 6.0$  Hz, 3 H, CH<sub>3</sub>-C-2), 0.96-0.80 (m, 18 H, D-Leu H- $\delta$  and D-Val H- $\gamma$ ).  $\delta_C$  (60 MHz, CDCl<sub>3</sub>) 176.5 (s, CO), 171.8 (s, CO), 171.7 (s, CO), 169.7 (s, CO), 169.2 (s, CO<sub>2</sub>Me), 97.1 (d, C-6), 68.1 (d), 61.9 (d), 57.2 (d), 56.7 (d), 55.2 (q, OCH<sub>3</sub>), 52.0 (d), 51.8 (t), 45.2 (t), 43.0 (t), 39.7 (q, CH<sub>3</sub>), 31.0 (d), 24.6 (d), 23.0 (q, CH<sub>3</sub>), 21.9 (q, CH<sub>3</sub>), 20.1 (q, CH<sub>3</sub>), 19.3 (q, CH<sub>3</sub>), 19.0 (q, CH<sub>3</sub>), 17.8 (q, CH<sub>3</sub>), 16.7 (q, CH<sub>3</sub>). ESI-MSMS  $m/z$  558.40 ( $M^+ + 1$ , 15), 526.10 ( $M^+ - OMe + 1$ , 100).

**Table S1.** <sup>1</sup>H chemical shift data for peptides **I** – **IV** in CDCl<sub>3</sub> and CD<sub>3</sub>CN

|                                 | <b>I</b>          |                    | <b>II</b>         |                    | <b>III</b>        |                    | <b>IV</b>         |                    |
|---------------------------------|-------------------|--------------------|-------------------|--------------------|-------------------|--------------------|-------------------|--------------------|
|                                 | CDCl <sub>3</sub> | CD <sub>3</sub> CN |
| Boc                             | 1.48              | 1.42               | 1.48              | 1.42               | 1.46              | 1.42               | 1.49              | 1.43               |
| D-Ala NH                        | 5.32              | 5.71               | 5.29              | 5.63               | 5.32              | 5.67               | 5.27              | 5.73               |
| D-Ala H-α                       | 4.24              | 4.13               | 4.30              | 4.16               | 4.26              | 4.13               | 4.12              | 4.15               |
| D-Ala H-β                       | 1.32              | 1.23               | 1.31              | 1.20               | 1.32              | 1.20               | 1.32              | 1.22               |
| D-Val <sub>1</sub> NH           | 7.65              | 7.37               | 7.79              | 7.60               | 7.68              | 7.55               | 7.50              | 7.23               |
| D-Val <sub>1</sub> H-α          | 4.48              | 4.56               | 4.49              | 4.58               | 4.56              | 4.55               | 4.38              | 4.62               |
| D-Val <sub>1</sub> H-β          | 2.16              | 2.06               | 2.16              | 2.07               | 2.19              | 2.14               | 2.15              | 2.12               |
| D-Val <sub>1</sub> H-γ          | 1.03              | 0.96               | 0.97              | 0.87               | 0.98              | 0.88               | 0.97              | 0.97               |
| H-2                             | 4.42              | 3.87-3.66          | 4.35-4.14         | 4.15-4.01          | 4.27              | 4.18-4.13          | 5.13-4.49         | 5.00-4.97          |
| CH <sub>3</sub> -2              | 1.33              | 1.25               | 1.35              | 1.30               | 1.33              | 1.27               | 1.32              | 1.23               |
| H-3                             | 4.35              | 3.86-3.67          | 4.31              | 4.18               | 4.15              | 4.18-4.13          | 4.87              | 4.63               |
| H-5                             | 3.78-3.75         | 3.62-3.59          | 4.16-3.37         | 4.20-3.24          | 3.96-3.76         | 3.84-3.76          | 5.96              | 5.94               |
| H-6                             | 3.90-3.74         | 3.60               | 4.85              | 4.86               | 4.83              | 4.84               | 6.44              | 6.46               |
| OCH <sub>3</sub> -6             | -                 | -                  | 3.43              | 3.36               | 3.45              | 3.40               | -                 | -                  |
| Gly NH                          | 7.08              | 7.35               | 6.79              | 7.30               | 6.72              | 7.25               | 7.50              | 7.47               |
| Gly H-α                         | 3.99-3.91         | 3.76               | 4.15-3.72         | 3.85,3.55          | 4.07-3.78         | 3.80,3.64          | 3.72              | 3.78               |
| D-Leu NH                        | 7.11              | 7.13               | 7.16              | 7.28               | 7.40              | 7.40               | 6.53              | 6.61               |
| D-Leu H-α                       | 4.43              | 4.44               | 4.42              | 4.46               | 4.44              | 4.48               | 4.39              | 4.36               |
| D-Leu H-β                       | 1.69              | 1.68-1.53          | 1.70              | 1.73-1.60          | 1.72              | 1.72-1.59          | 1.70-1.59         | 1.55               |
| D-Leu H-γ                       | 1.69              | 1.68-1.53          | 1.70              | 1.73-1.58          | 1.72              | 1.71               | 1.59              | 1.41               |
| D-Leu H-δ                       | 0.98              | 0.92               | 0.95              | 0.92               | 0.96              | 0.90               | 0.94              | 0.91               |
| D-Val <sub>2</sub> NH           | 6.69              | 7.01               | 6.71              | 7.02               | 6.62              | 7.03               | 6.74              | 6.92               |
| D-Val <sub>2</sub> H-α          | 4.49              | 4.27               | 4.49              | 4.25               | 4.49              | 4.25               | 4.49              | 4.27               |
| D-Val <sub>2</sub> H-β          | 2.18              | 2.10               | 2.18              | 2.07               | 2.31              | 2.09               | 2.19              | 2.10               |
| D-Val <sub>2</sub> H-γ          | 0.94              | 0.90               | 0.94              | 0.90               | 0.94              | 0.90               | 0.94              | 0.91               |
| CO <sub>2</sub> CH <sub>3</sub> | 3.76              | 3.67               | 3.76              | 3.67               | 3.76              | 3.68               | 3.76              | 3.67               |

**Table S2.**  $^{13}\text{C}$  chemical shift data for peptides **I** – **IV** in  $\text{CDCl}_3$  and  $\text{CD}_3\text{CN}$

|                                | <b>I</b>        |                        | <b>II</b>       |                        | <b>III</b>      |                        | <b>IV</b>       |                        |
|--------------------------------|-----------------|------------------------|-----------------|------------------------|-----------------|------------------------|-----------------|------------------------|
|                                | $\text{CDCl}_3$ | $\text{CD}_3\text{CN}$ | $\text{CDCl}_3$ | $\text{CD}_3\text{CN}$ | $\text{CDCl}_3$ | $\text{CD}_3\text{CN}$ | $\text{CDCl}_3$ | $\text{CD}_3\text{CN}$ |
| Boc                            | 28.2            | 27.5                   | 27.8            | 27.5                   | 27.8            | 27.6                   | 28.5            | 27.5                   |
| D-Ala NH                       | -               | -                      | -               | -                      | -               | -                      | -               | -                      |
| D-Ala C- $\alpha$              | 50.1            | 49.8                   | 50.1            | 49.7                   | 49.8            | 49.8                   | 49.4            | 49.8                   |
| D-Ala C- $\beta$               | 17.9            | 16.9                   | 19.2            | 17.5                   | 18.5            | 17.6                   | 16.5            | 16.6                   |
| D-Val <sub>1</sub> NH          | -               | -                      | -               | -                      | -               | -                      | -               | -                      |
| D-Val <sub>1</sub> C- $\alpha$ | 55.1            | 54.1                   | 54.7            | 53.7                   | 54.4            | 54.1                   | 55.1            | 54.7                   |
| D-Val <sub>1</sub> C- $\beta$  | 30.8            | 30.1                   | 30.8            | 30.1                   | 30.2            | 29.8                   | 29.5            | 29.8                   |
| D-Val <sub>1</sub> C- $\gamma$ | 18.2            | 18.5                   | 18.6            | 18.7                   | 22.5            | 17.9                   | 21.5            | 22.2                   |
| C-2                            | 68.7            | 60.4                   | 62.7            | 63.0                   | 67.3            | 67.3                   | 57.7            | 69.7                   |
| $\text{CH}_3$ -2               | 17.8            | 17.0                   | 18.9            | 17.8                   | 19.2            | 18.4                   | 16.8            | 16.7                   |
| C-3                            | 60.1            | 42.5                   | 64.0            | 63.7                   | 61.7            | 62.0                   | 56.4            | 56.4                   |
| C-5                            | 42.5            | 51.5                   | 44.1            | 43.8                   | 45.1            | 42.5                   | 102.5           | 103.9                  |
| C-6                            | 60.1            | 42.4                   | 97.2            | 97.2                   | 97.2            | 97.2                   | 129.4           | 130.5                  |
| $\text{OCH}_3$                 | -               | -                      | 55.1            | 54.1                   | 54.7            | 54.4                   | .               | -                      |
| Gly NH                         | -               | -                      | -               | -                      | -               | -                      | -               | -                      |
| Gly C- $\alpha$                | 43.1            | 42.5                   | 43.1            | 42.1                   | 42.8            | 42.5                   | 42.7            | 42.8                   |
| D-Leu NH                       | -               | -                      | -               | -                      | -               | -                      | -               | -                      |
| D-Leu C- $\alpha$              | 51.8            | 51.1                   | 51.7            | 50.7                   | 51.7            | 50.8                   | 51.7            | 51.1                   |
| D-Leu C- $\beta$               | 39.8            | 24.2                   | 39.8            | 40.1                   | 39.4            | 40.1                   | 39.8            | 40.5                   |
| D-Leu C- $\gamma$              | 24.5            | 17.5                   | 24.5            | 24.2                   | 24.2            | 24.2                   | 24.2            | 27.5                   |
| D-Leu C- $\delta$              | 19.2            | 17.3                   | 19.5            | 22.2                   | 17.9,17.5       | 20.5                   | 18.5,17.5       | 17.9                   |
| D-Val <sub>2</sub> NH          | -               | -                      | -               | -                      | -               | -                      | -               | -                      |
| D-Val <sub>2</sub> C- $\alpha$ | 57.4            | 57.7                   | 57.7            | 57.7                   | 56.7            | 57.7                   | 56.7            | 57.4                   |
| D-Val <sub>2</sub> C- $\beta$  | 30.8            | 29.8                   | 30.8            | 30.1                   | 30.2            | 29.8                   | 30.5            | 29.8                   |
| D-Val <sub>2</sub> C- $\gamma$ | 22.8            | 20.9                   | 22.8            | 20.9                   | 21.5            | 20.6                   | 21.5            | 20.5                   |
| $\text{CO}_2\text{CH}_3$       | 52.1            | 51.4                   | 52.1            | 51.1                   | 51.7            | 51.4                   | 52.1            | 51.4                   |



**Table S3.** ROESY data in CD<sub>3</sub>CN for compounds **I-IV**.

| ROESY cross-peaks                 | I                | II          | III              | IV          |
|-----------------------------------|------------------|-------------|------------------|-------------|
| D-Val <sub>1</sub> H-α / H-5      | 4.56 / 3.62-3.59 | 4.58 / 4.20 | 4.55 / 3.84      | -           |
| D-Val <sub>1</sub> NH / D-Ala H-α | 7.37 / 4.13      | 7.60 / 4.16 | 7.55 / 4.13      | 7.23 / 4.15 |
| D-Val <sub>1</sub> NH / D-Ala H-β | -                | 7.60 / 1.20 | 7.55 / 1.20      | -           |
| H-2 / H-6                         | -                | -           | 4.16 / 4.84      | -           |
| Gly NH / H-2                      | 7.35 / 3.87      | 7.30 / 4.07 | 7.25 / 4.15      | 7.47 / 4.98 |
| Gly NH / D Leu H-α                | -                | 7.30 / 4.44 | -                | -           |
| Gly H-α / H-3                     | -                | -           | 3.81 / 4.18      | -           |
| Gly NH / CH <sub>3</sub> -2       | 7.35 / 1.25      | -           | 7.25 / 1.27      | -           |
| D-Leu NH / Gly H-α                | -                | 7.28 / 3.57 | 7.40 / 3.80-3.65 | 6.61 / 3.78 |
| D-Leu NH / Gly NH                 | -                | -           | 7.40 / 7.25      | 6.61 / 7.47 |
| D-Val <sub>2</sub> NH / D-Leu H-α | 7.01 / 4.44      | 7.02 / 4.46 | 7.03 / 4.48      | 6.92 / 4.36 |

# Compound 1a

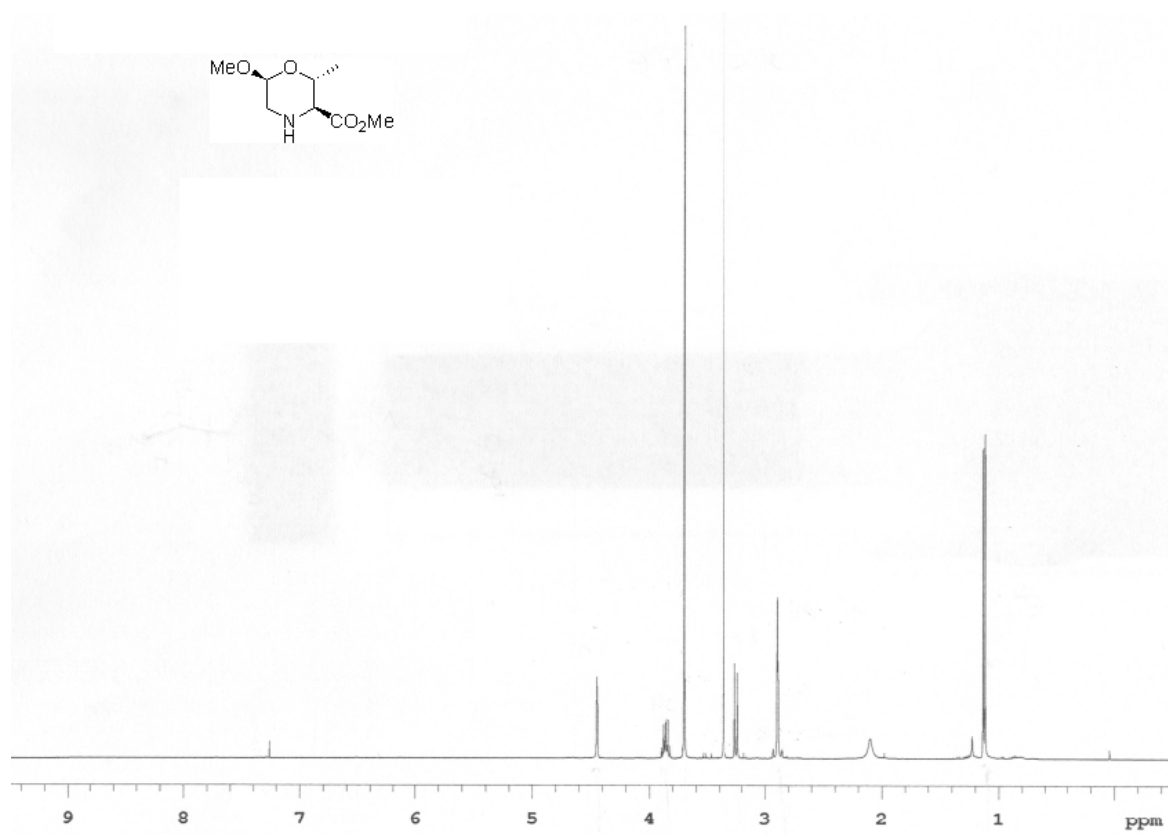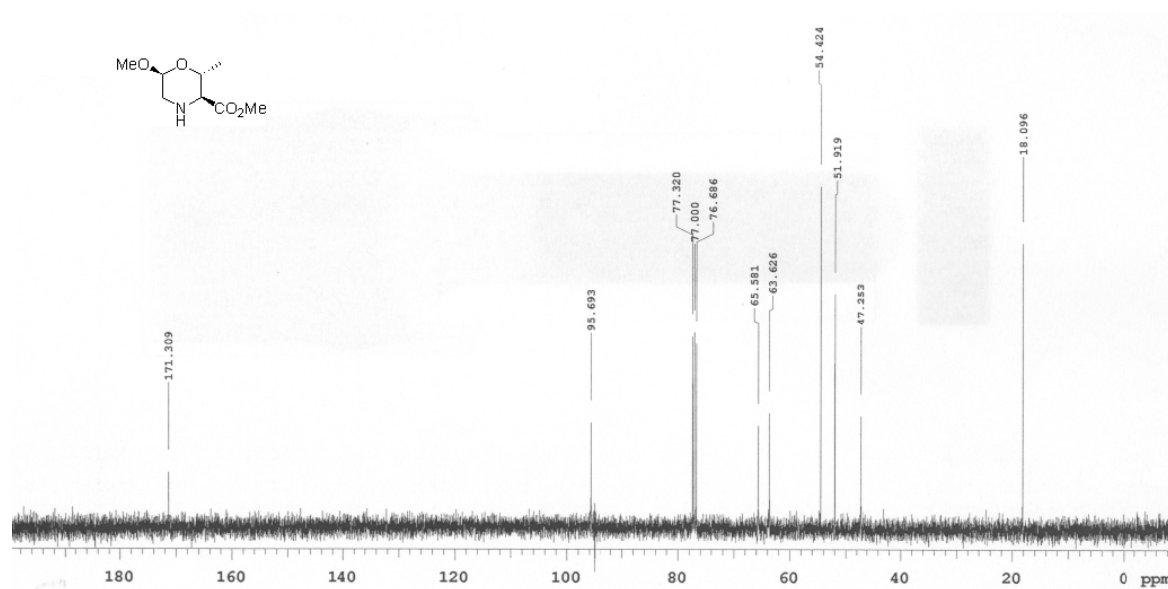

## Compound 1b

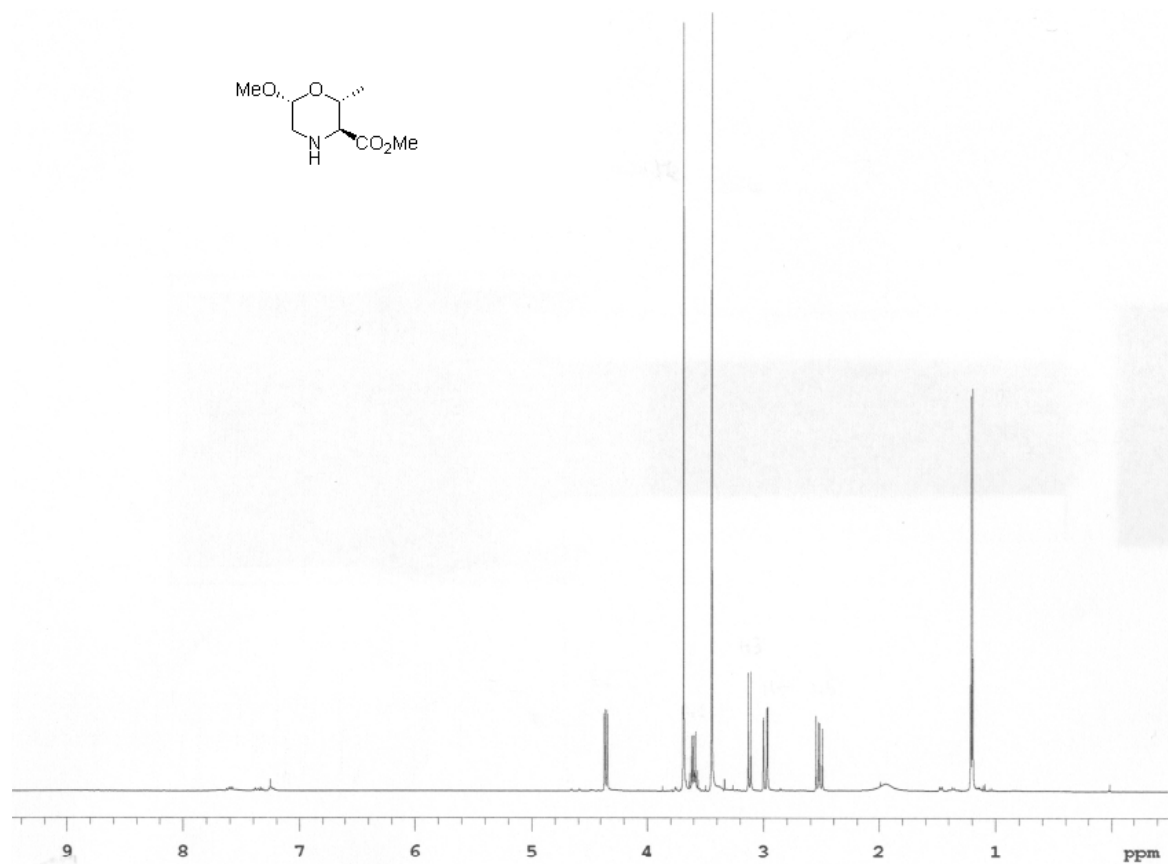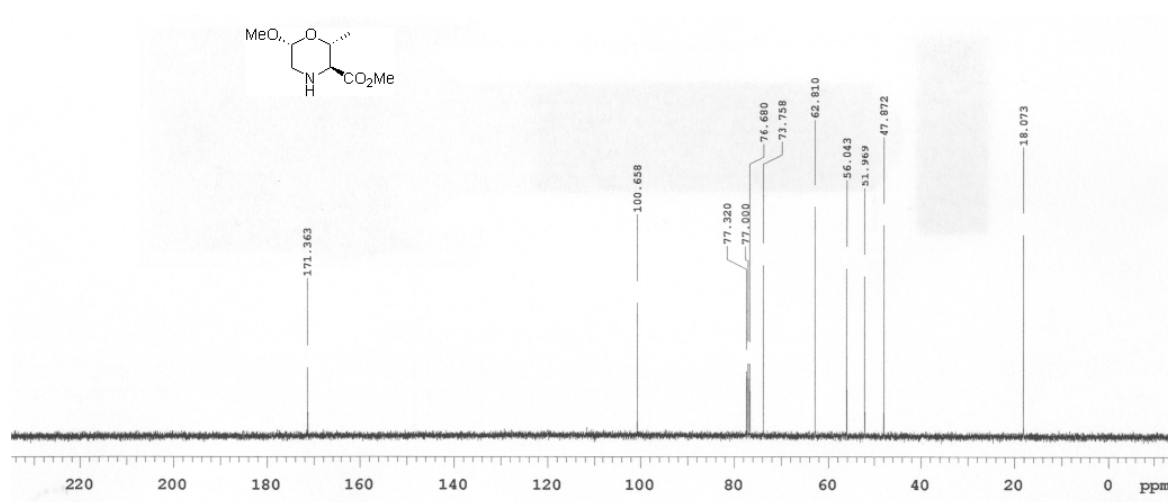

## Compound 2

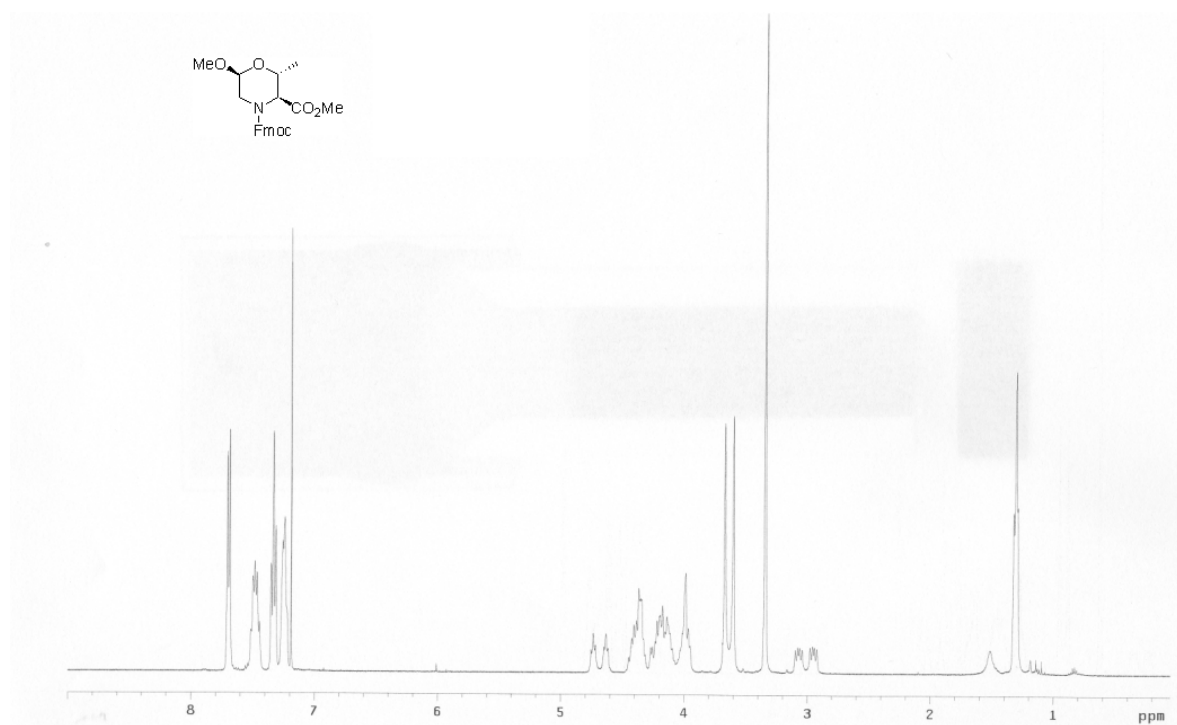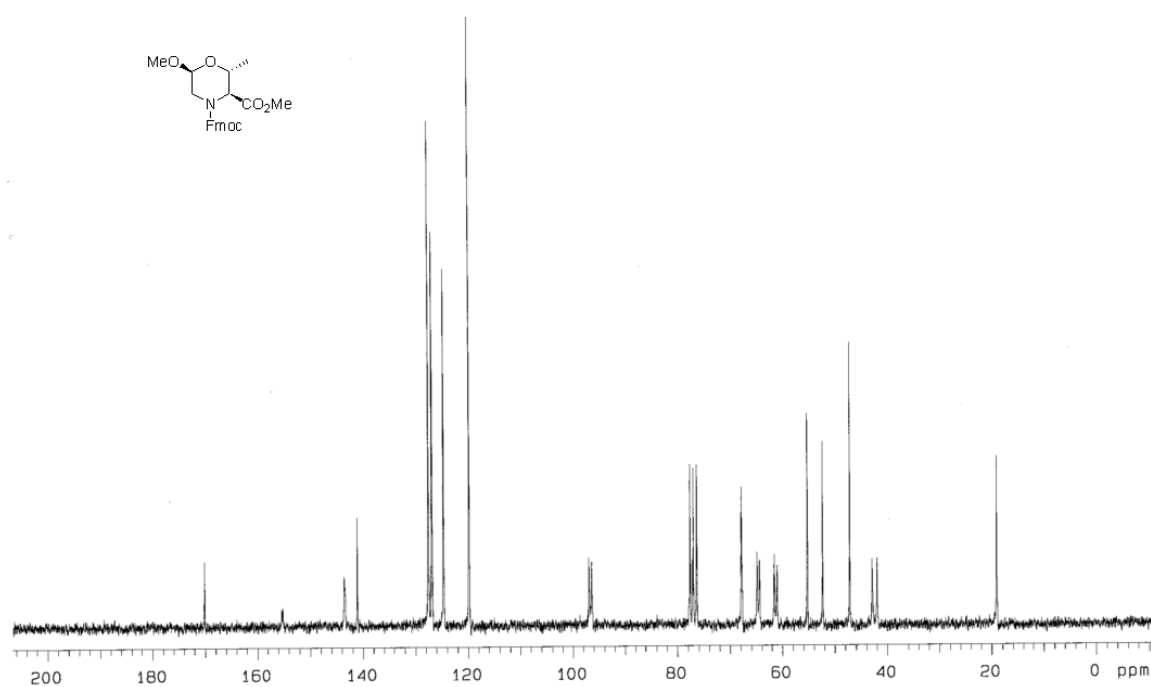

# Compound 3

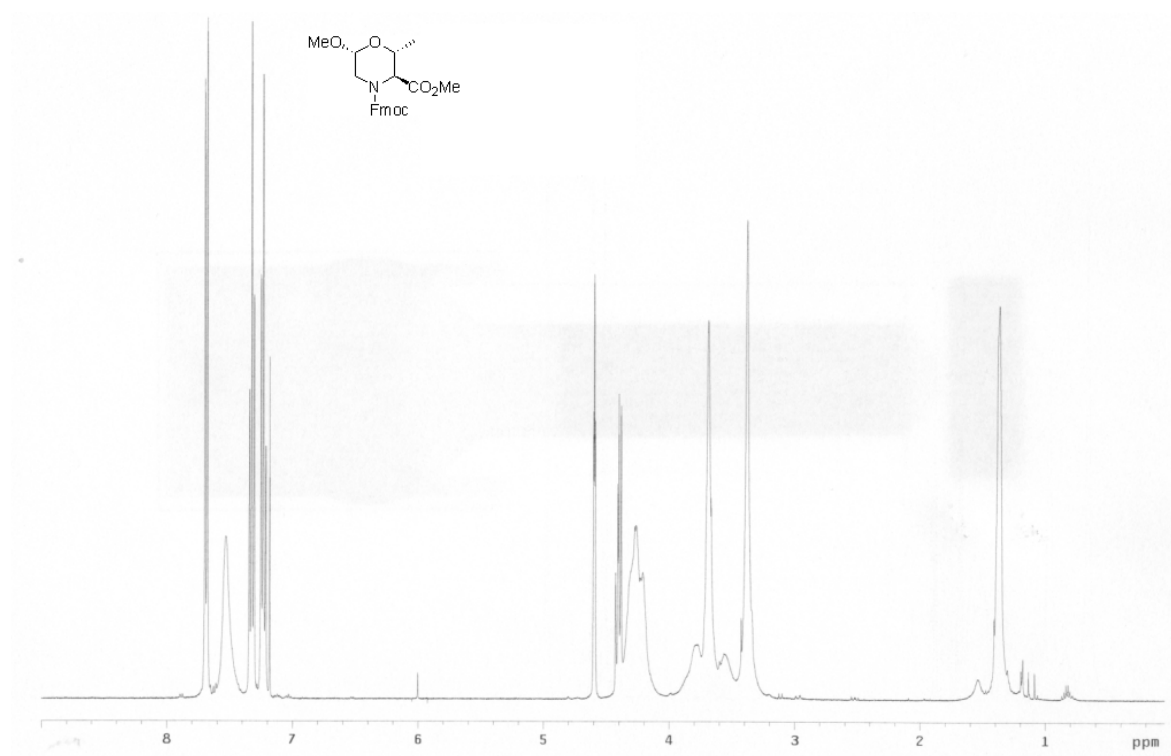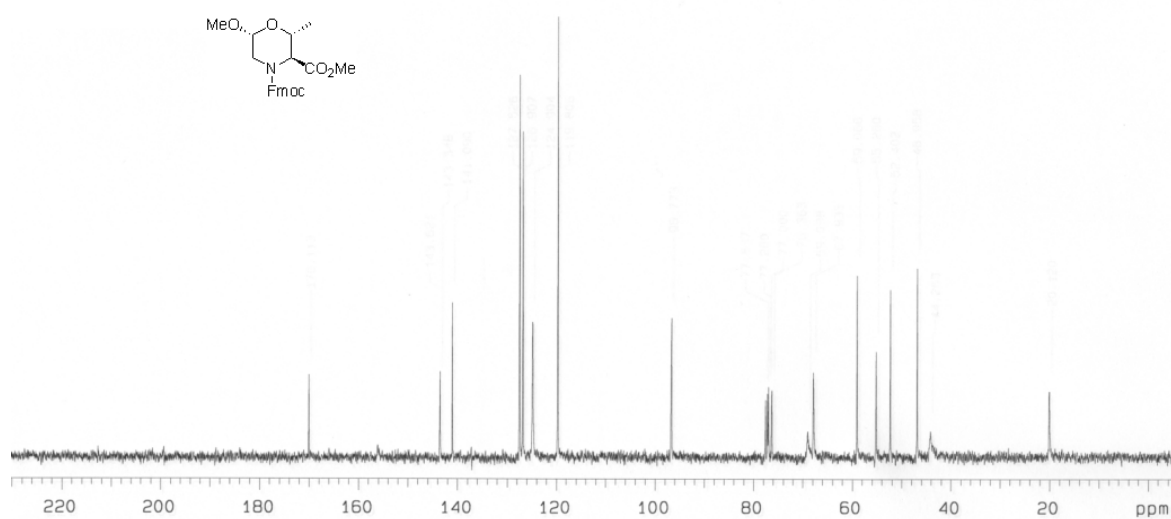

## Compound 6

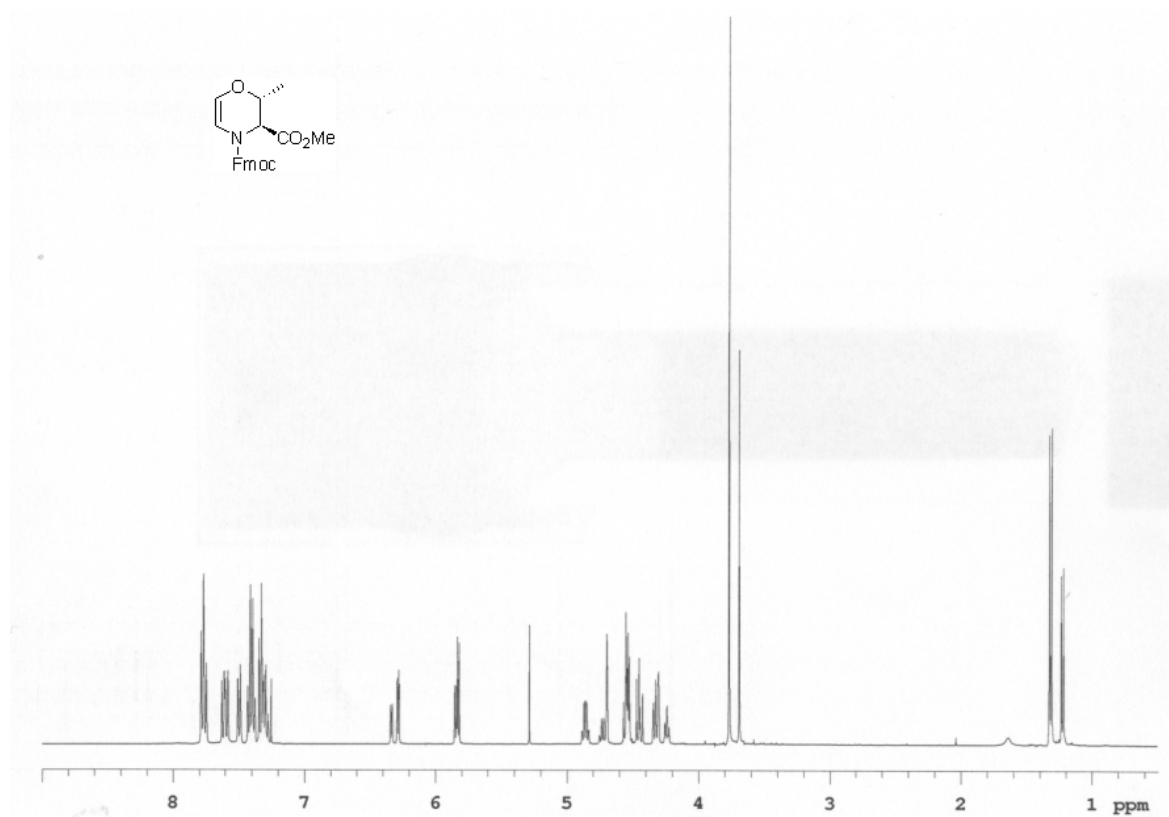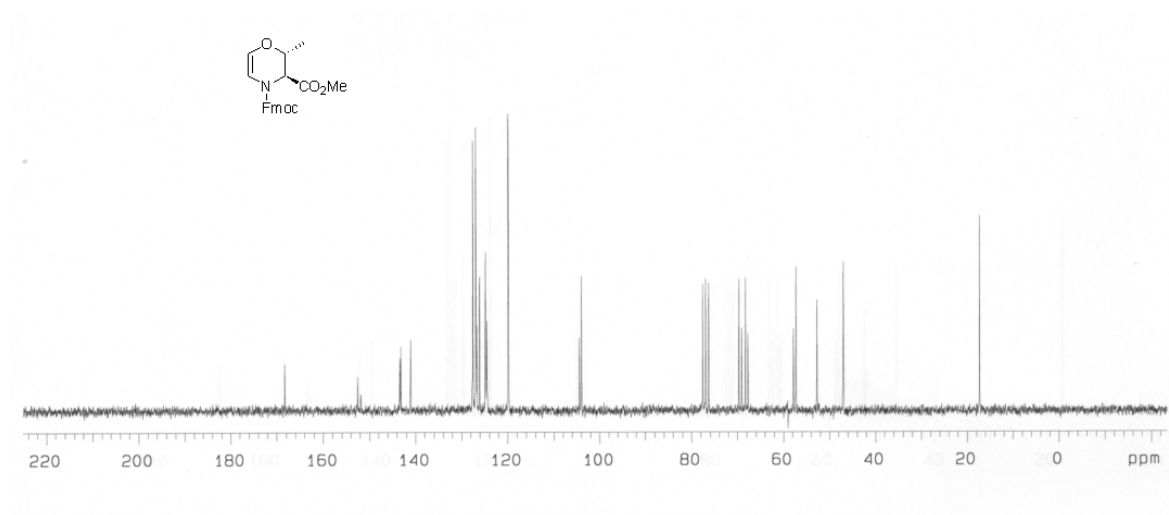

## Compound 7

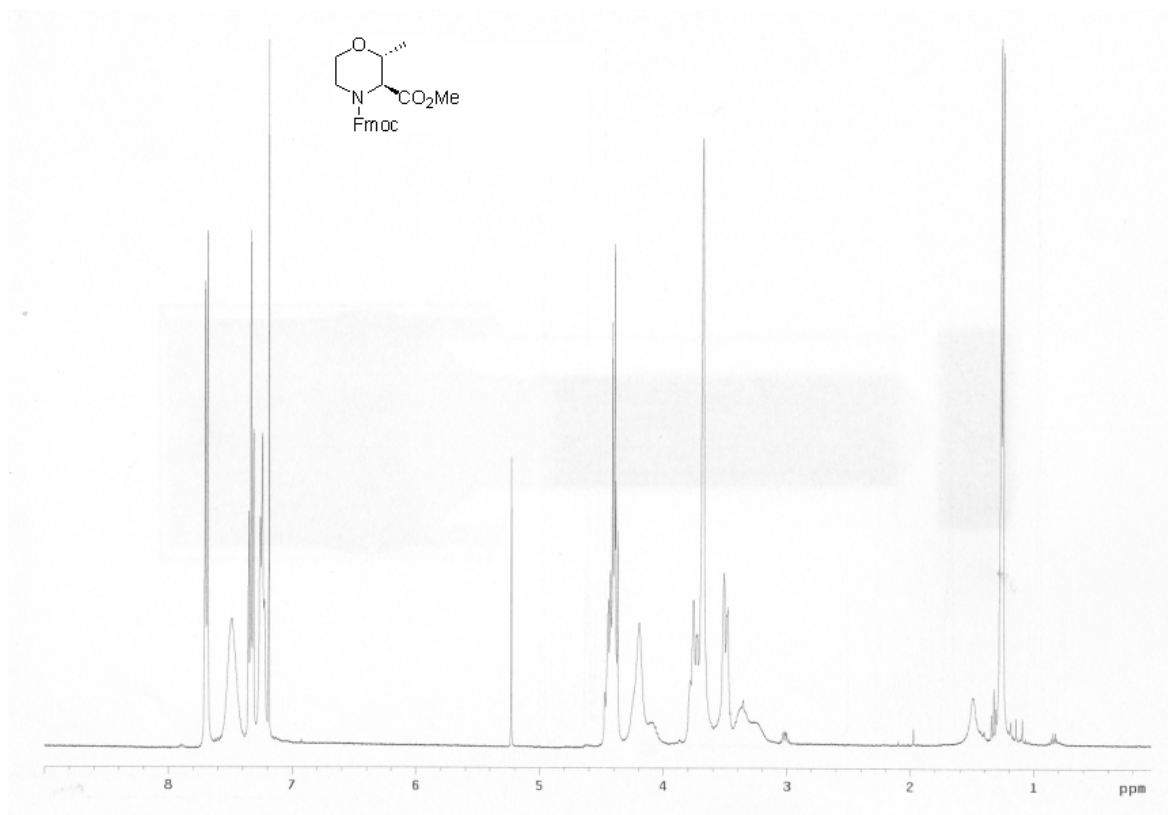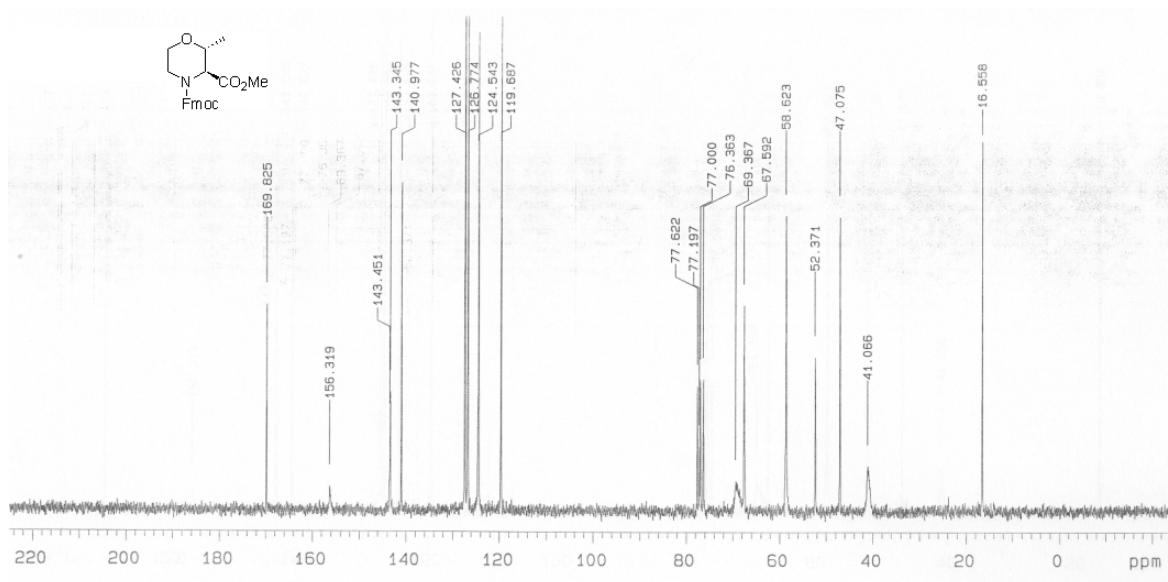

## Compound 8

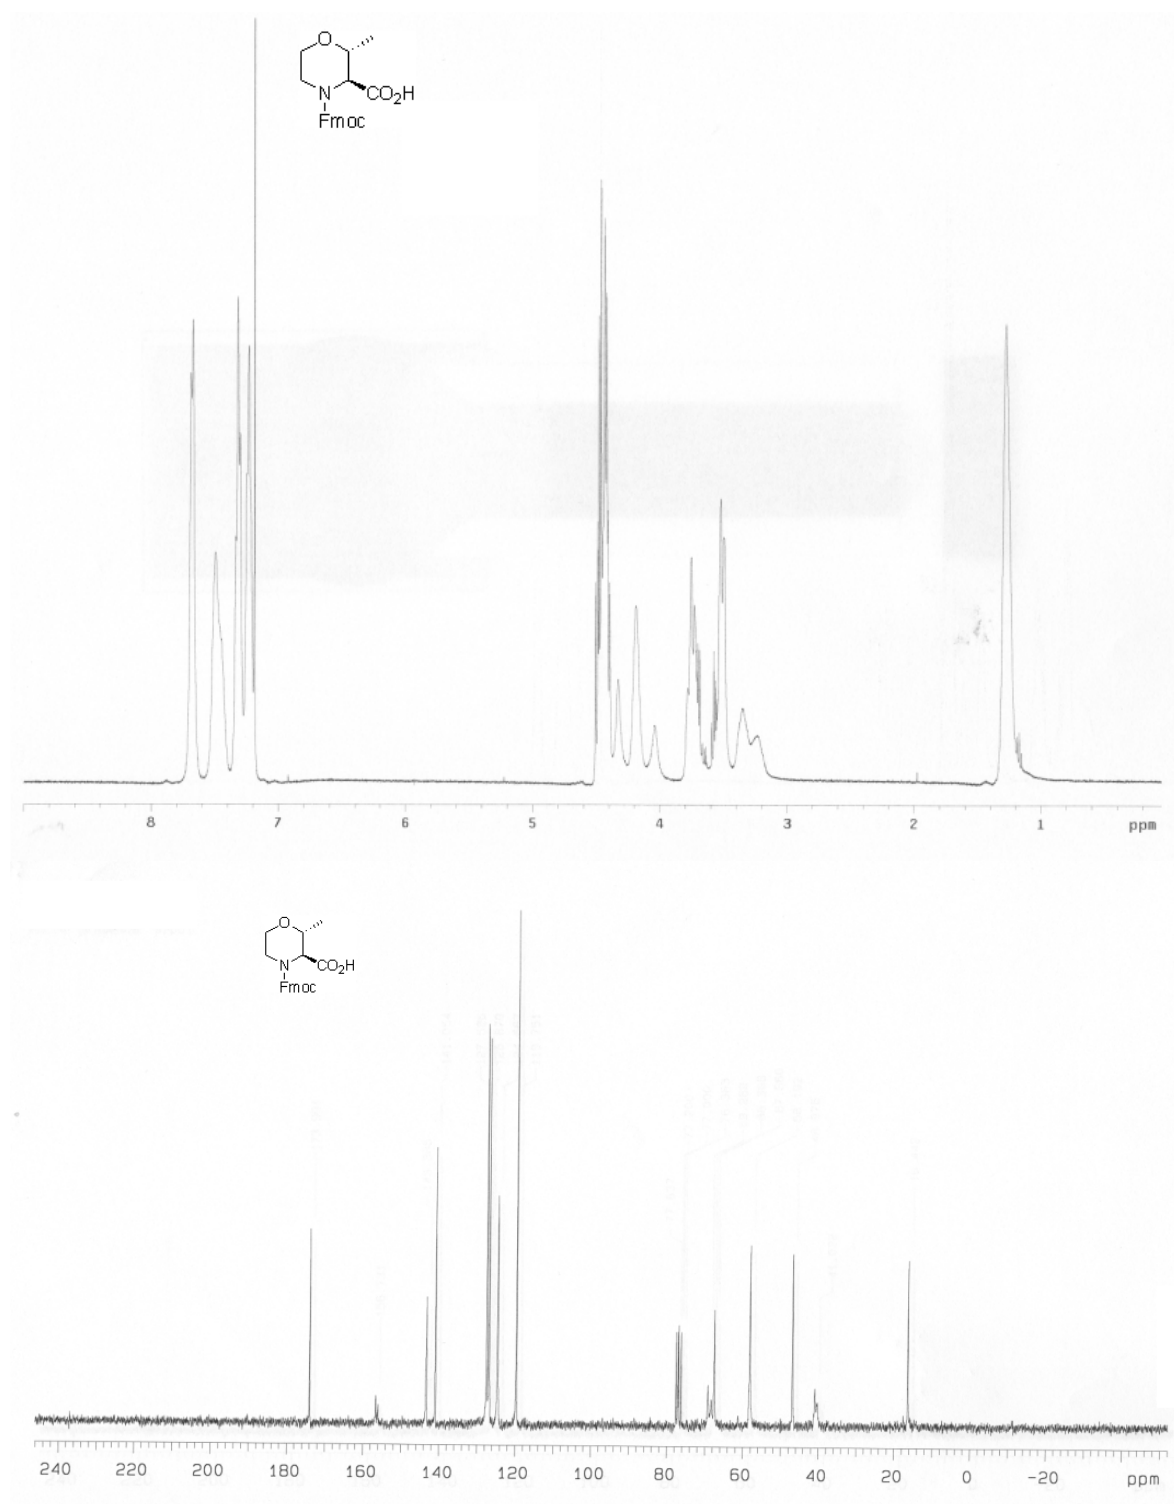



## Compound 4

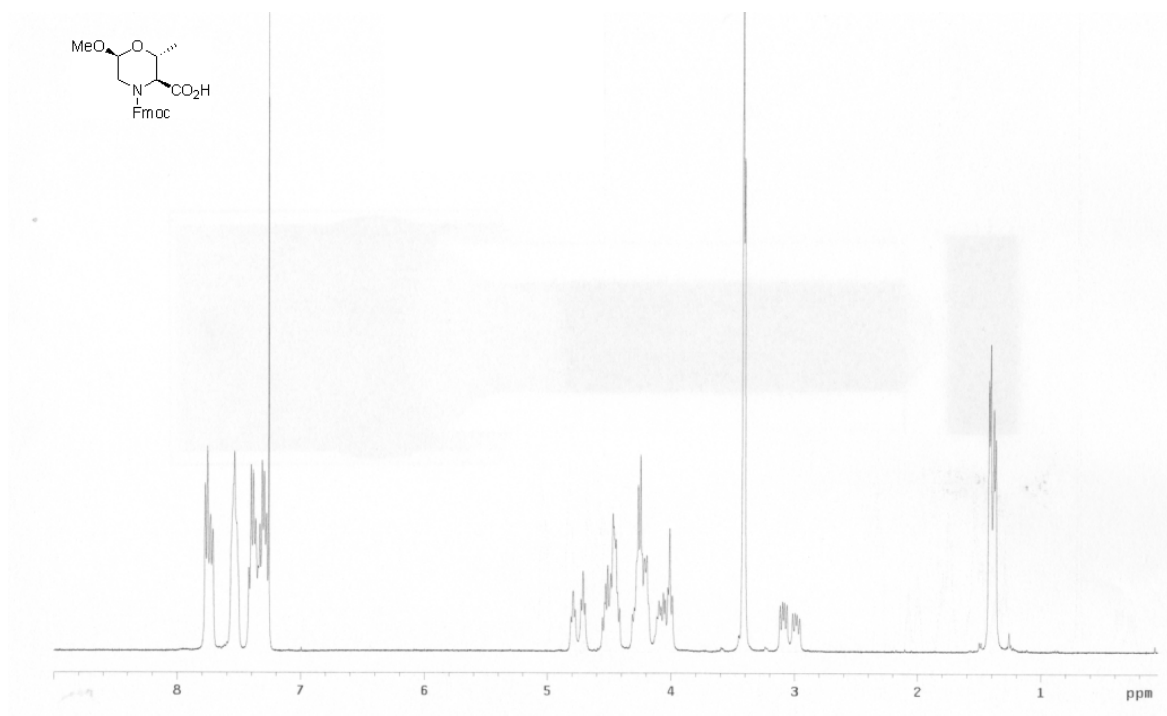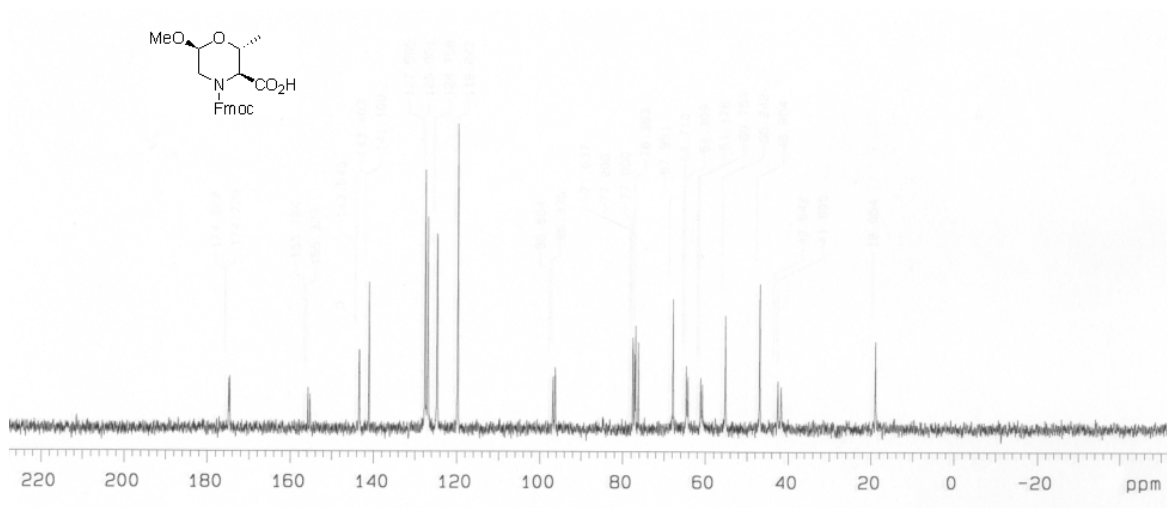

## Compound 5

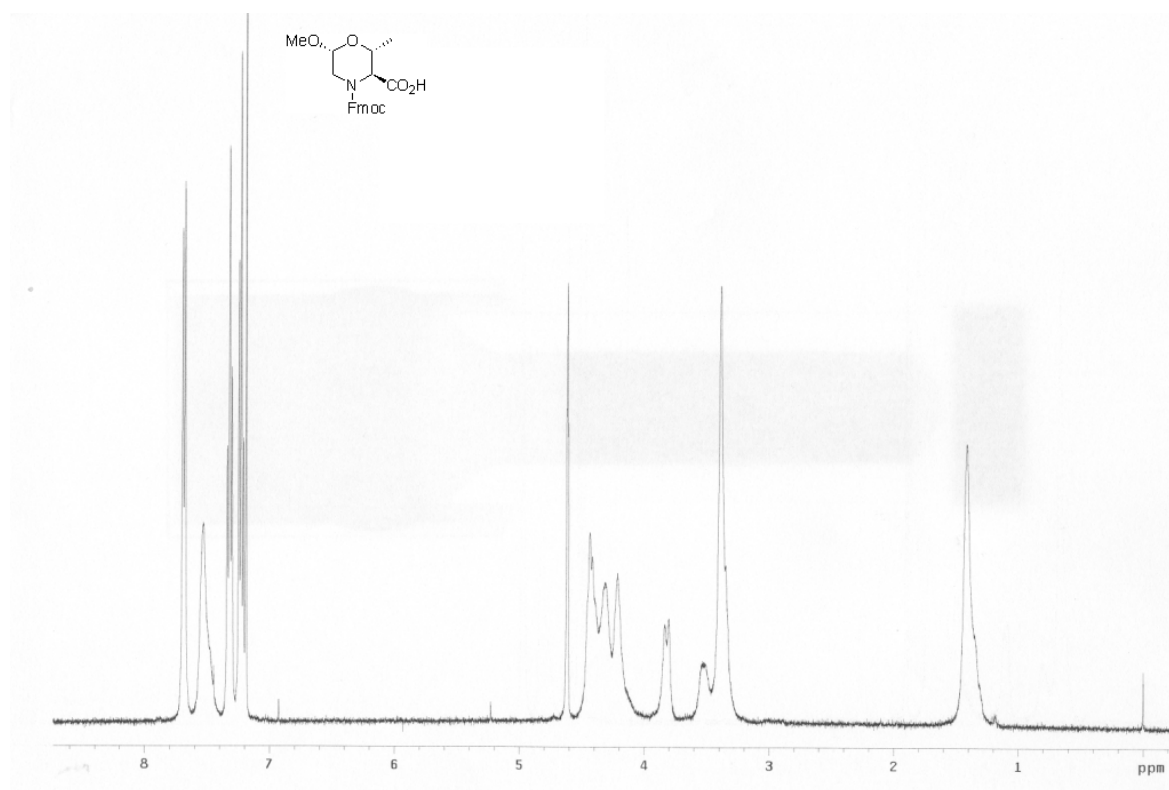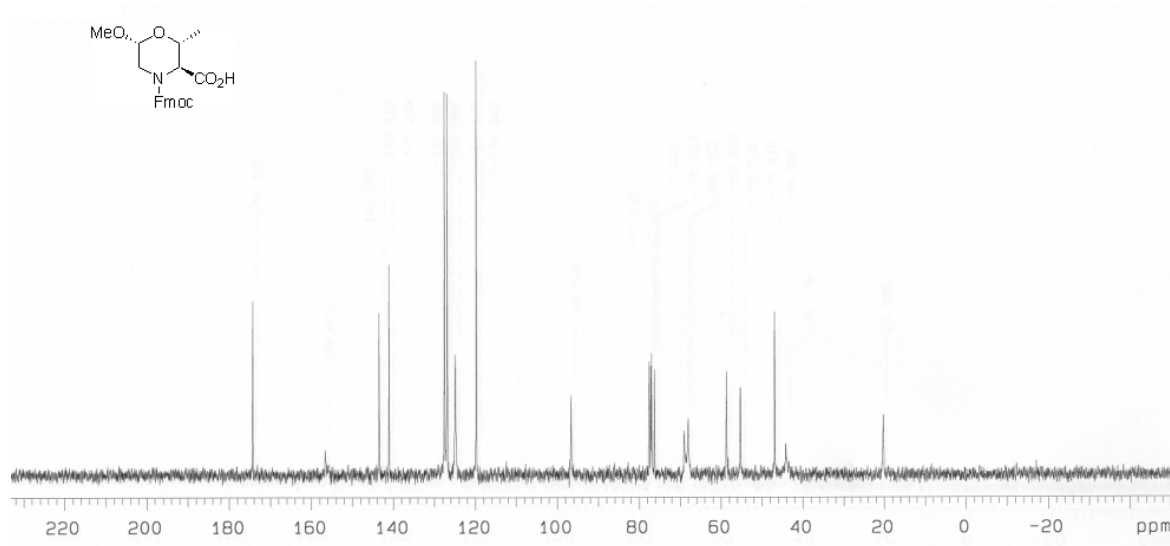

## Peptide Gly-D-Leu-D-Val-OMe

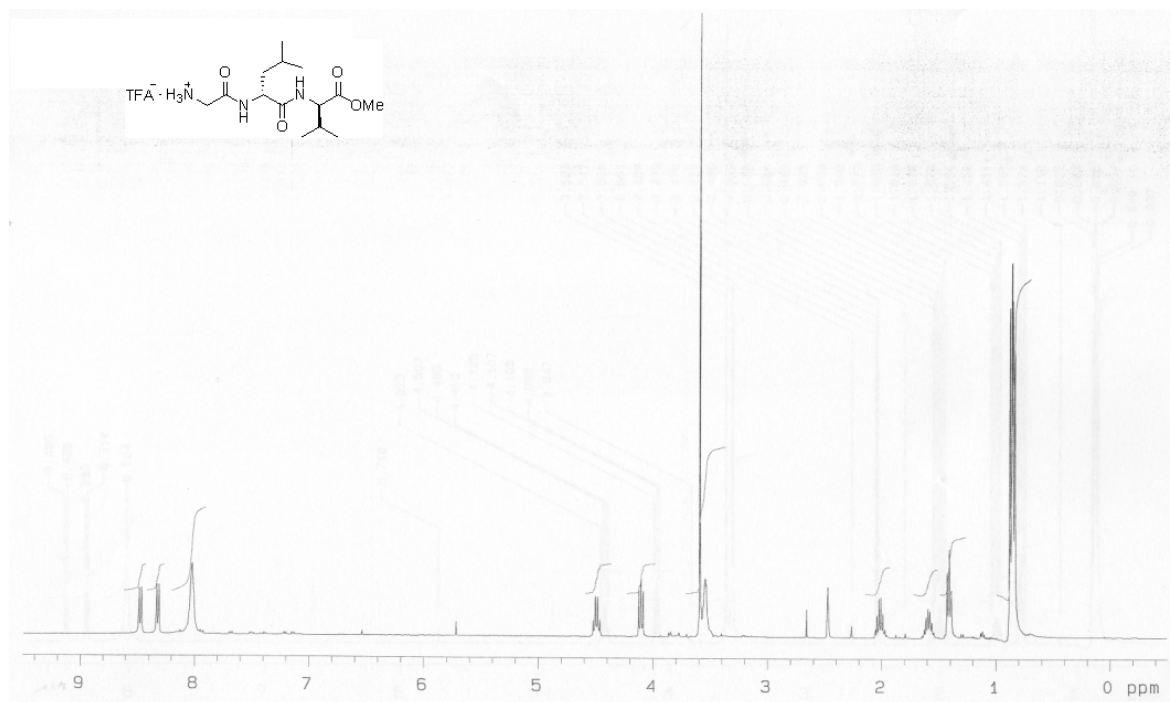

## Compound 9a

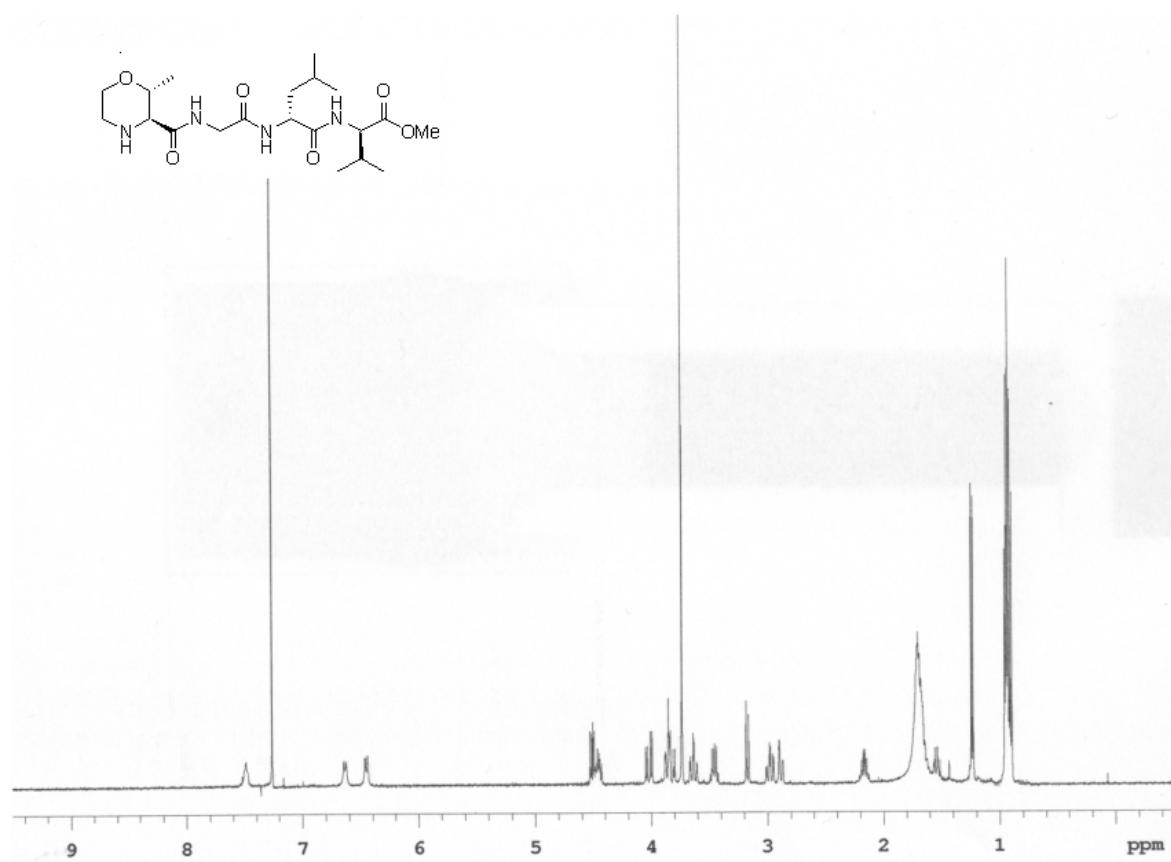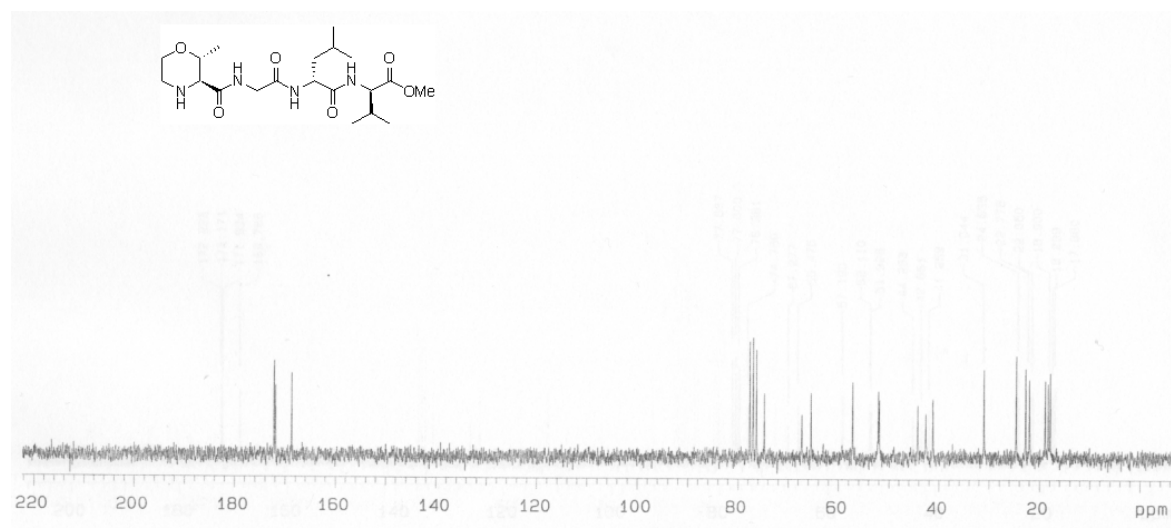

## Compound 9b

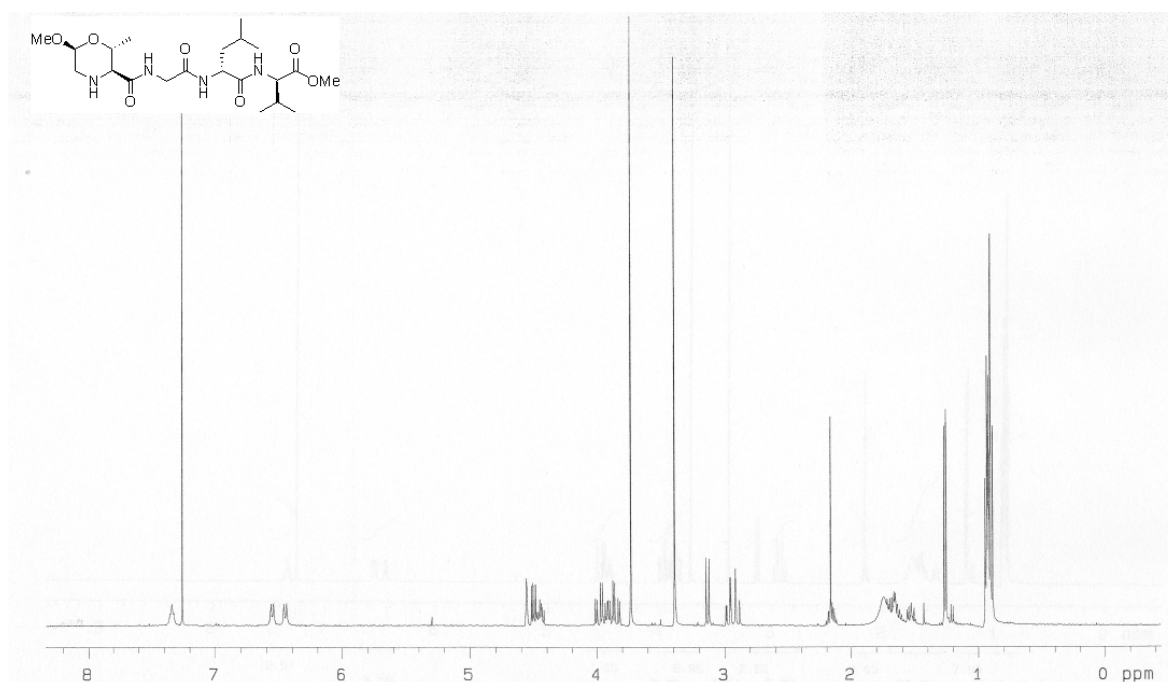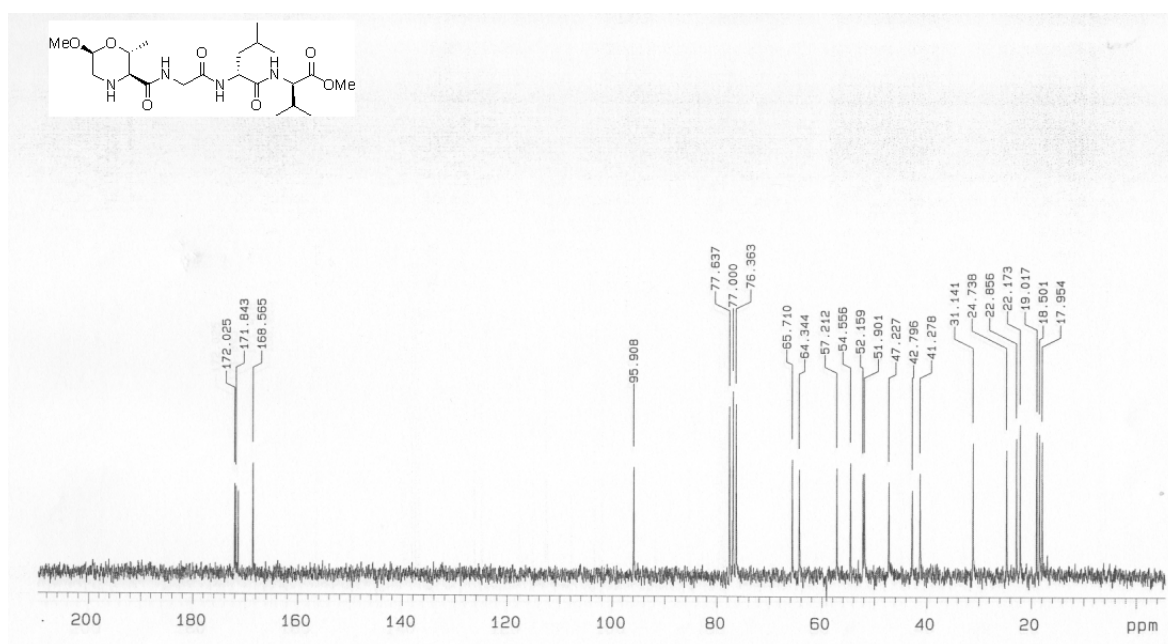

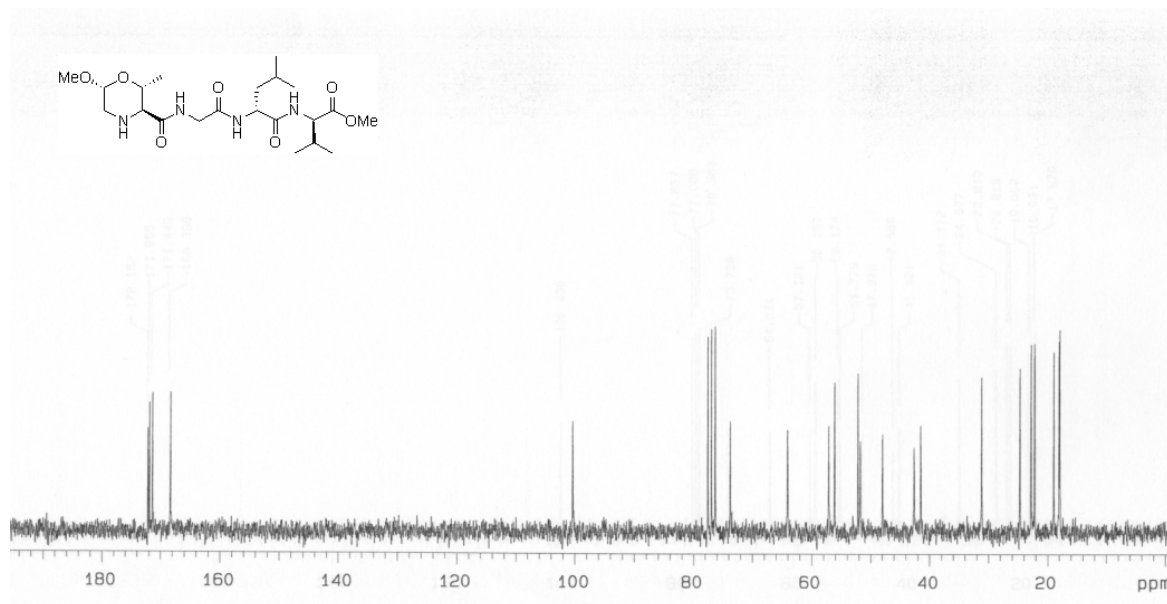

## Compound 10a

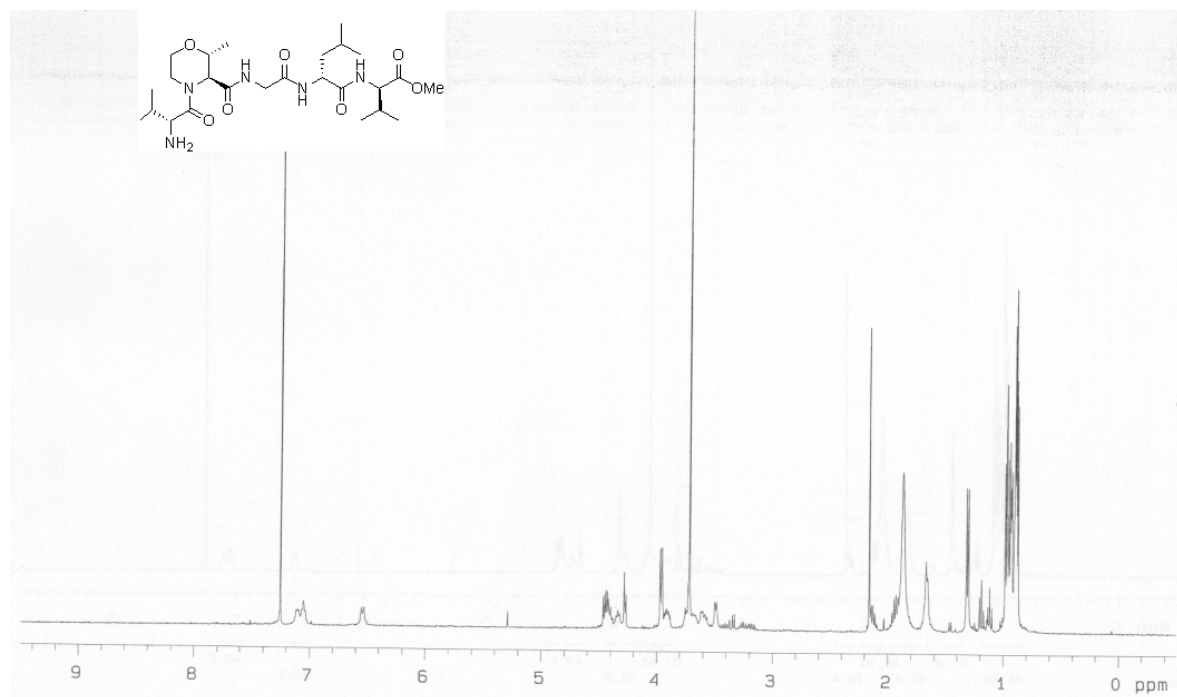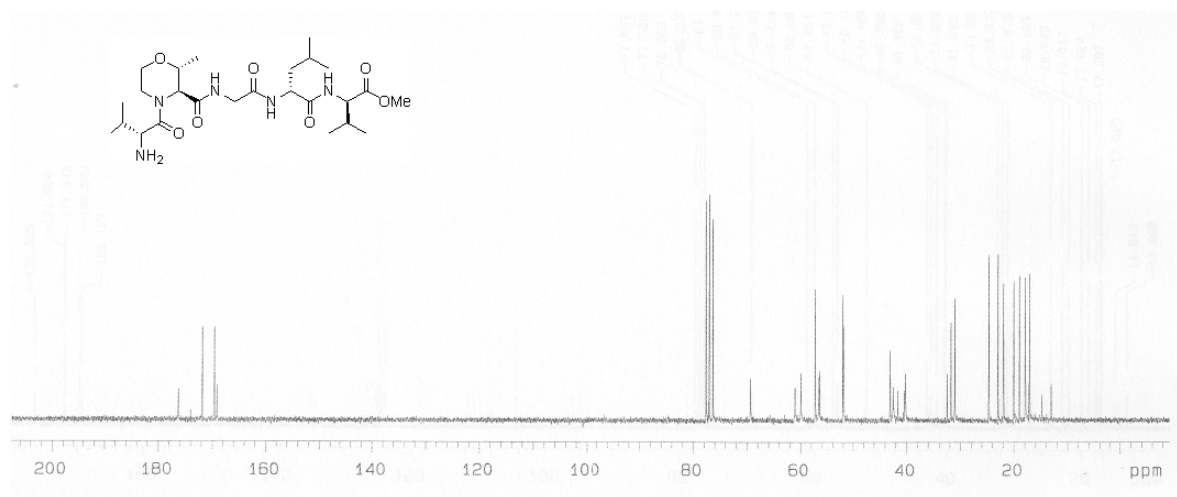

## Compound 10b

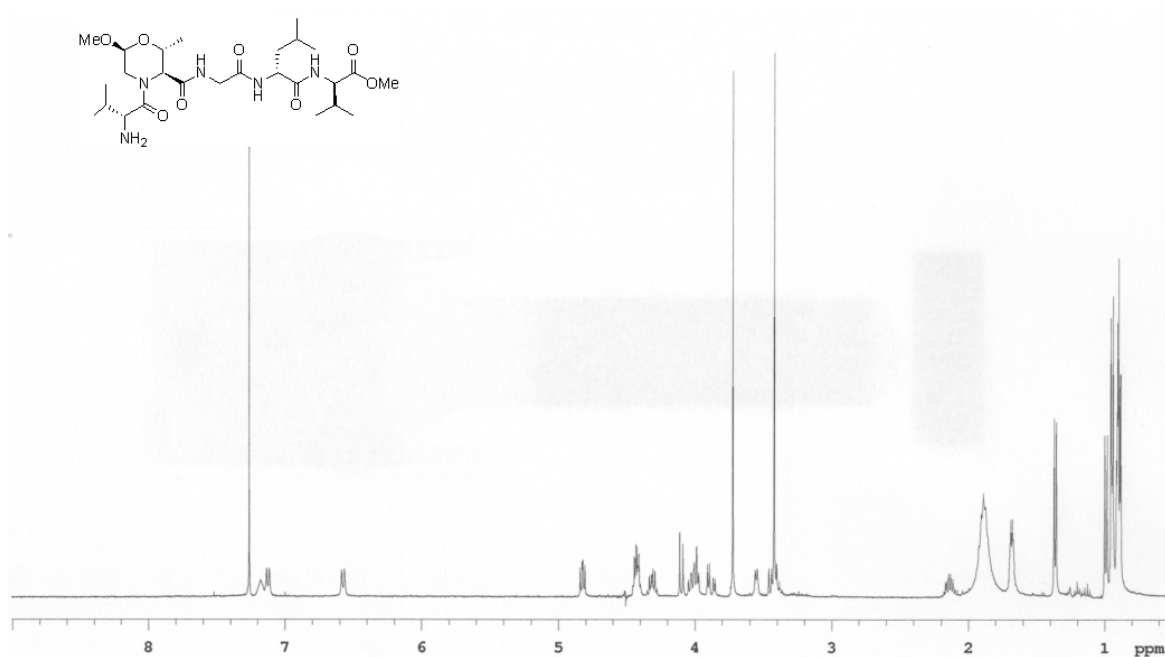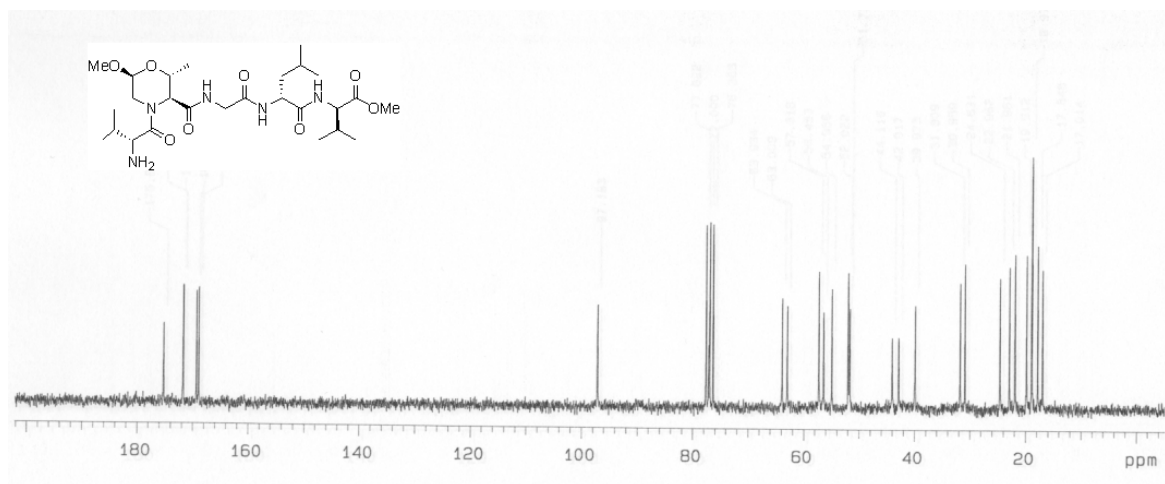



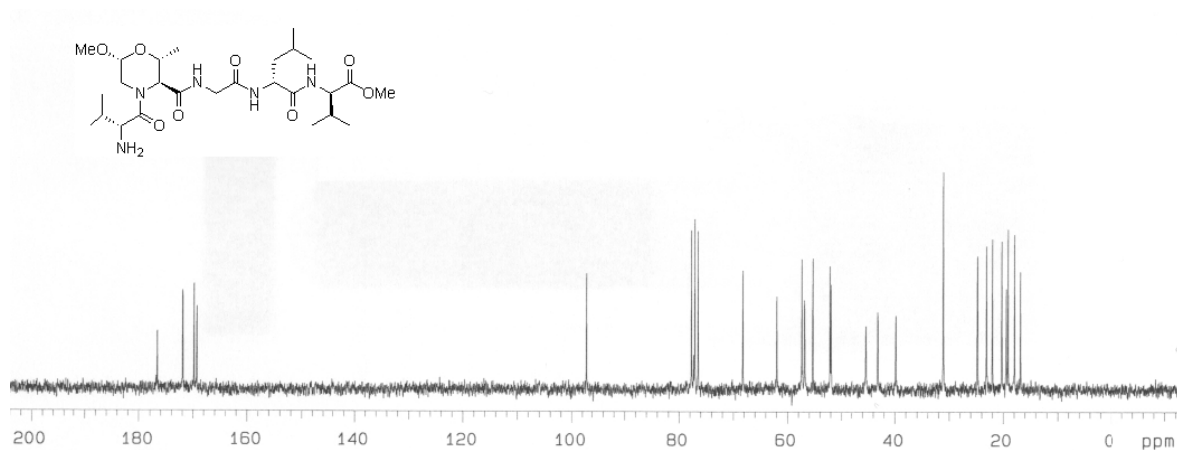

# Compound 11

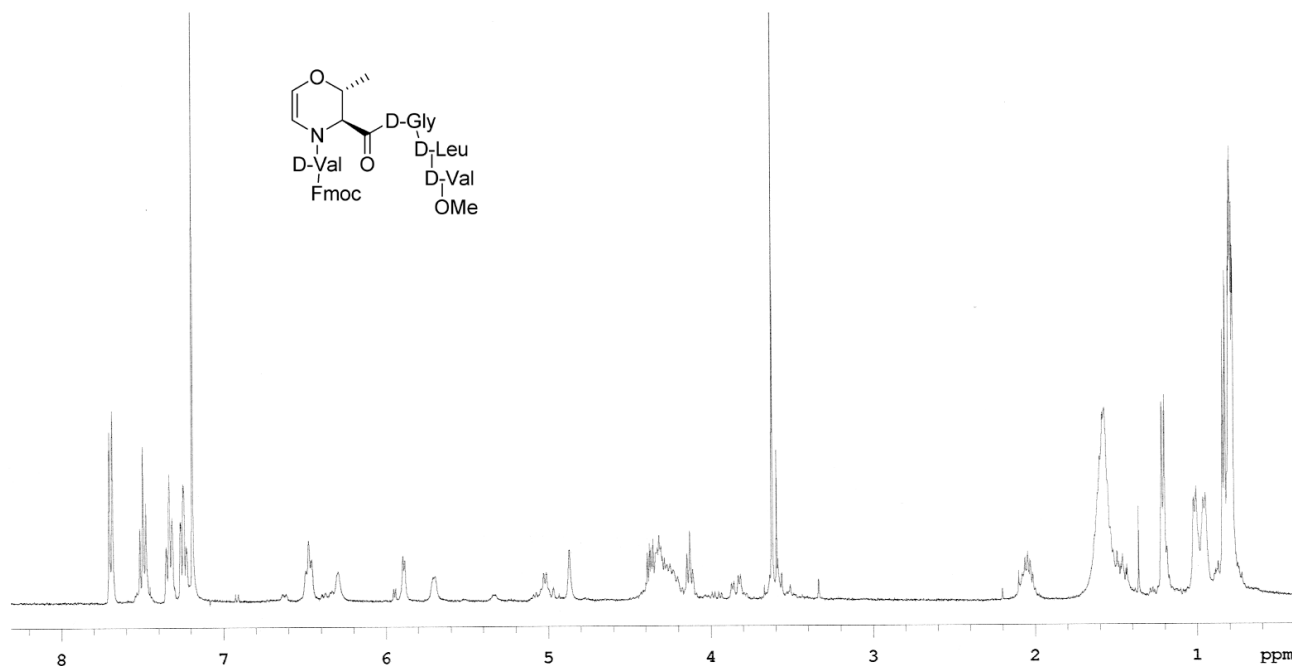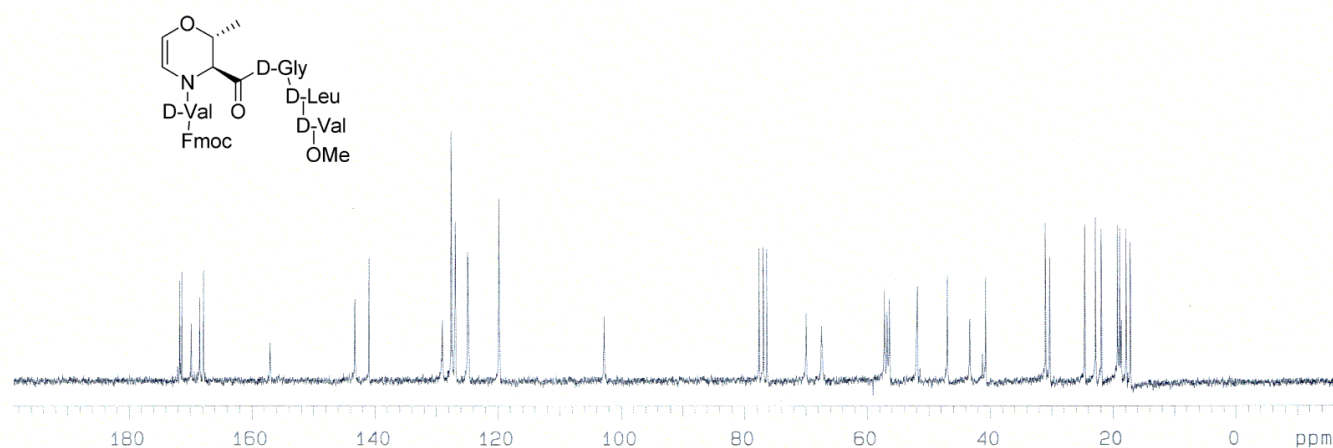

## Compound I

$^1\text{H}$  in  $\text{CD}_3\text{CN}$

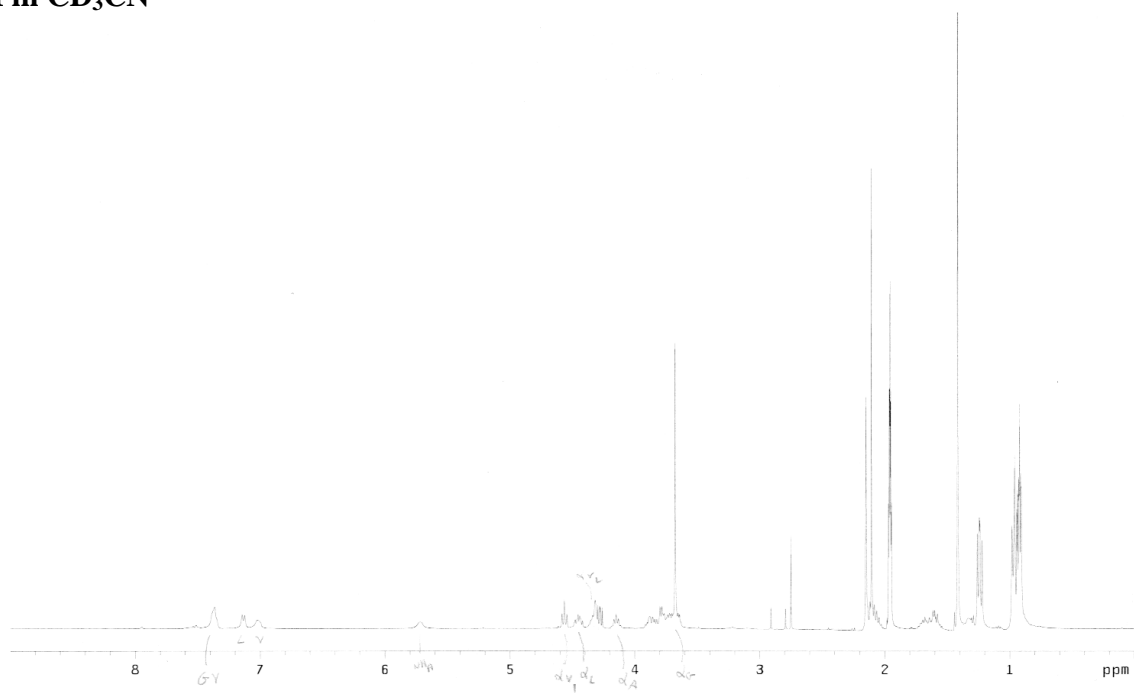

$^1\text{H}$  in  $\text{CDCl}_3$

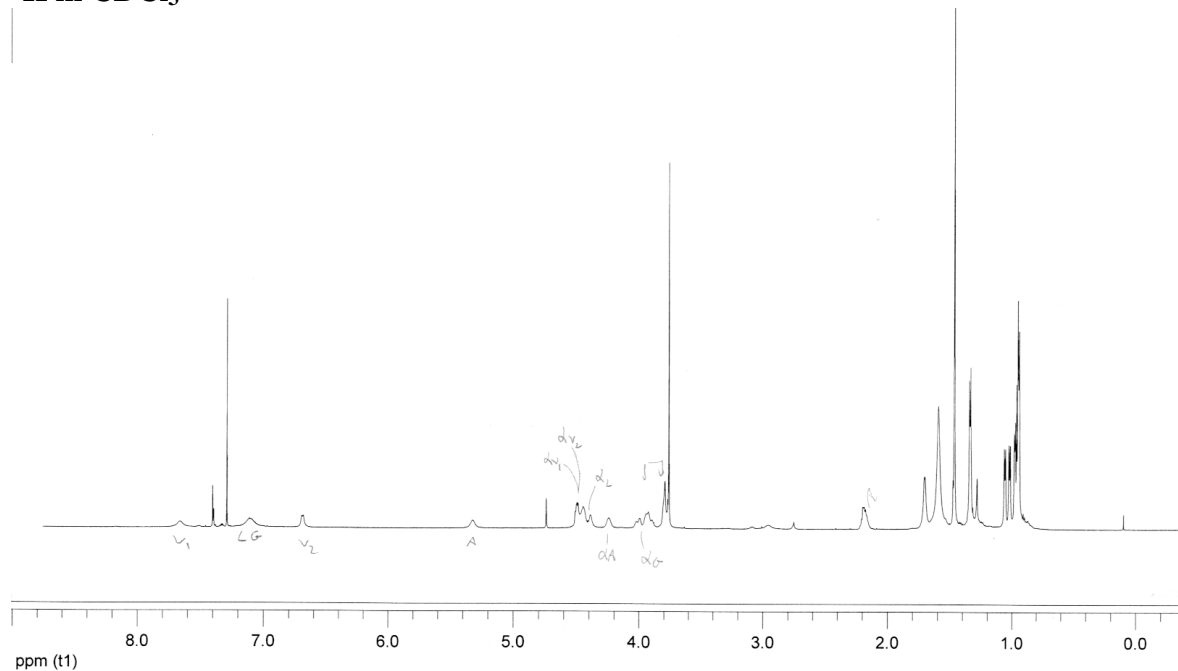

## TOCSY

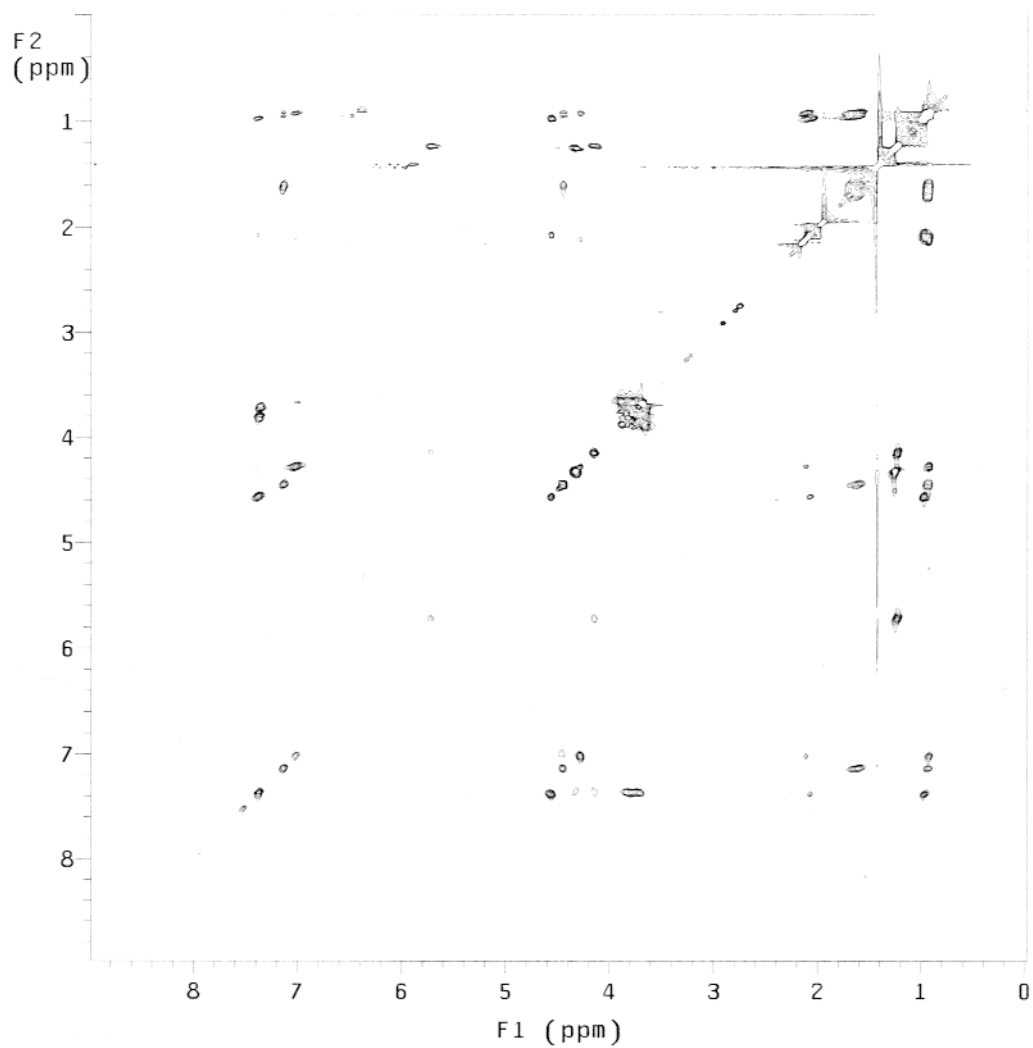

## ROESY

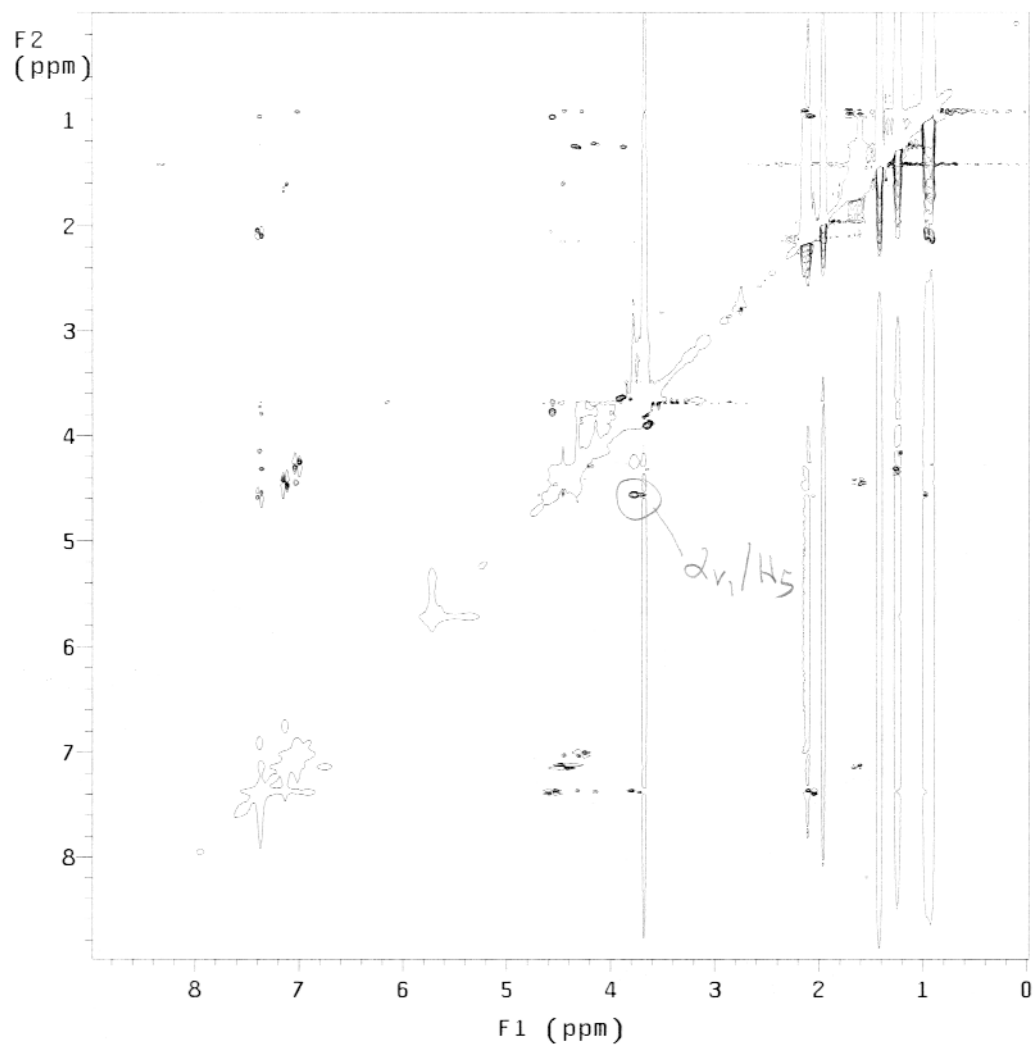

## gHSQC

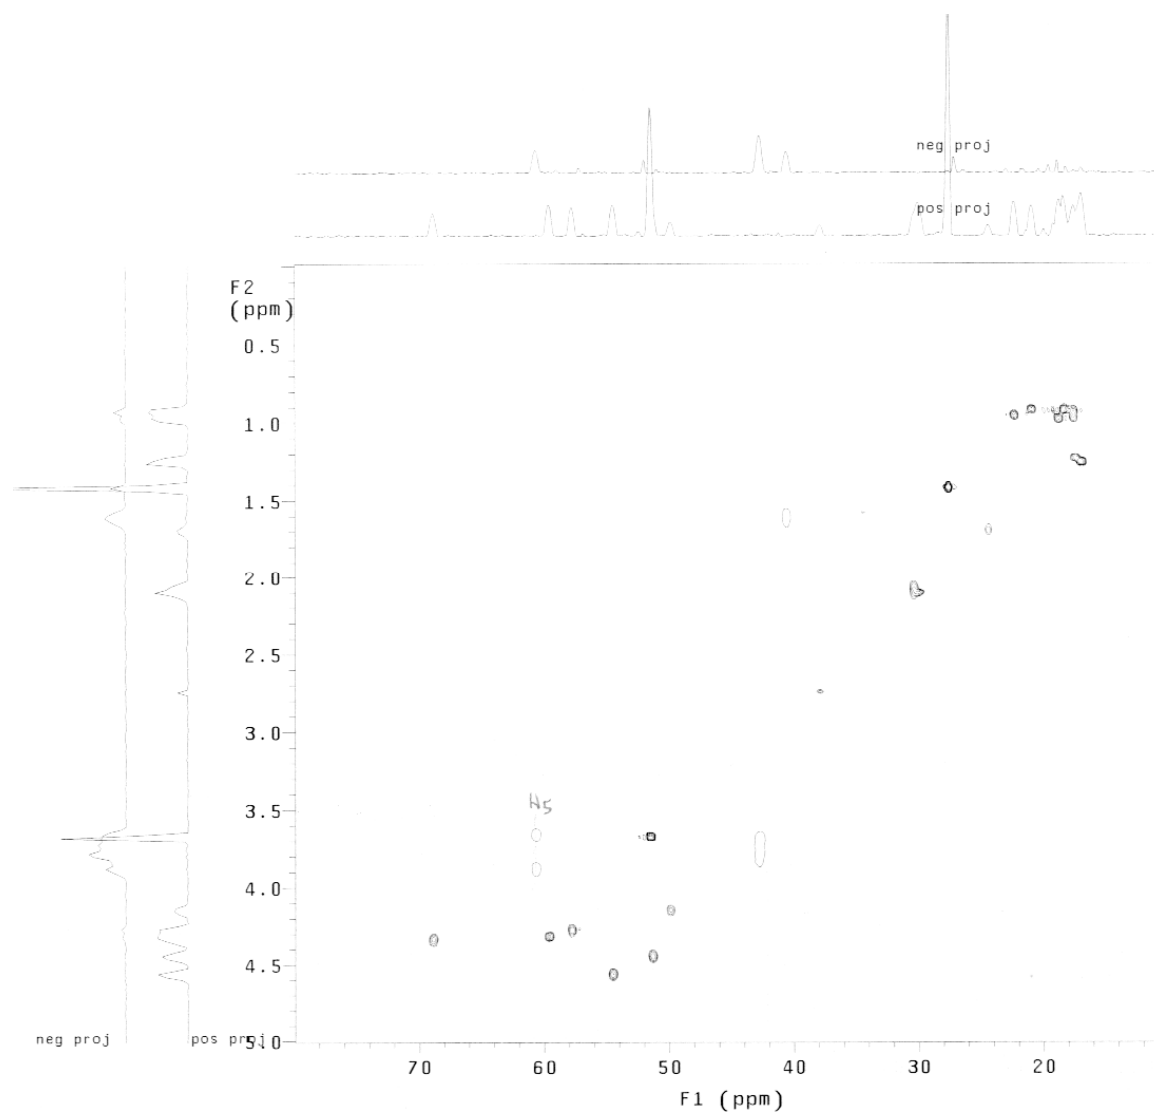

## Compound II

$^1\text{H}$  in  $\text{CD}_3\text{CN}$

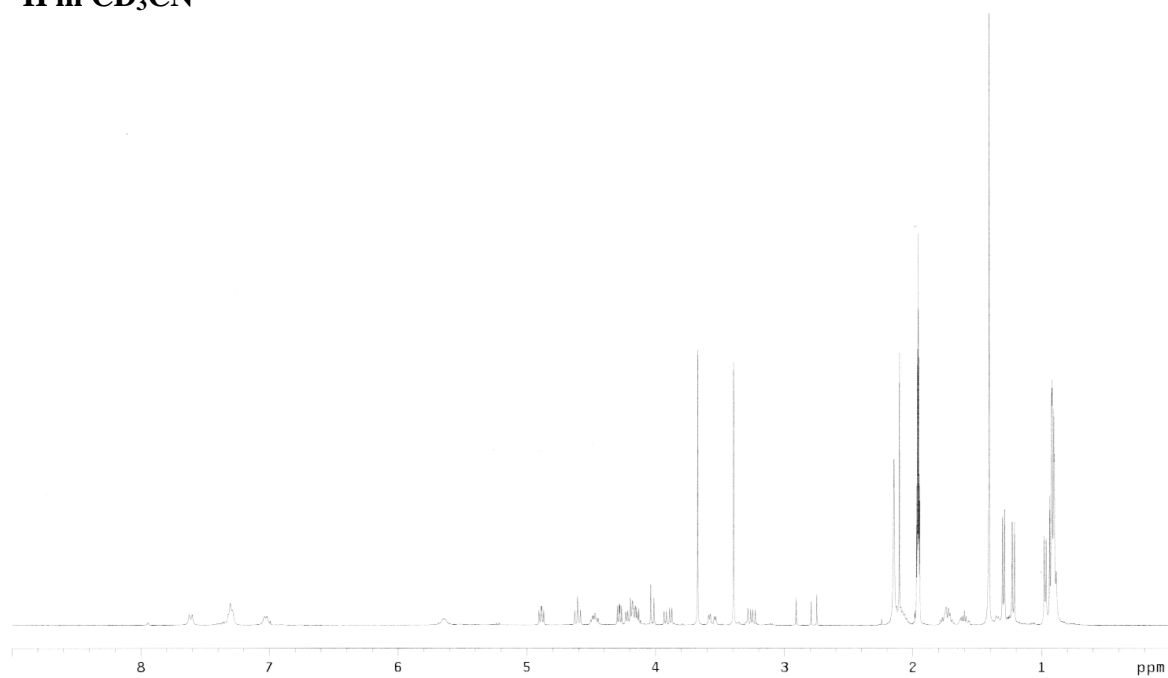

$^1\text{H}$  in  $\text{CDCl}_3$

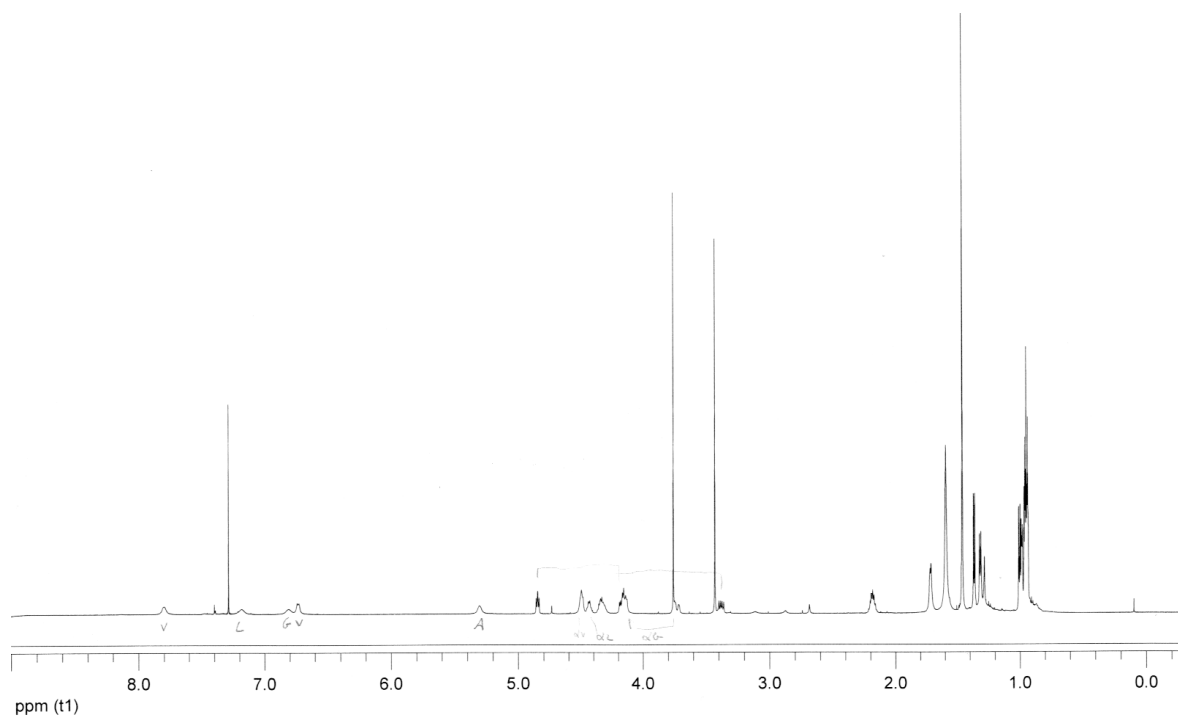

## TOCSY

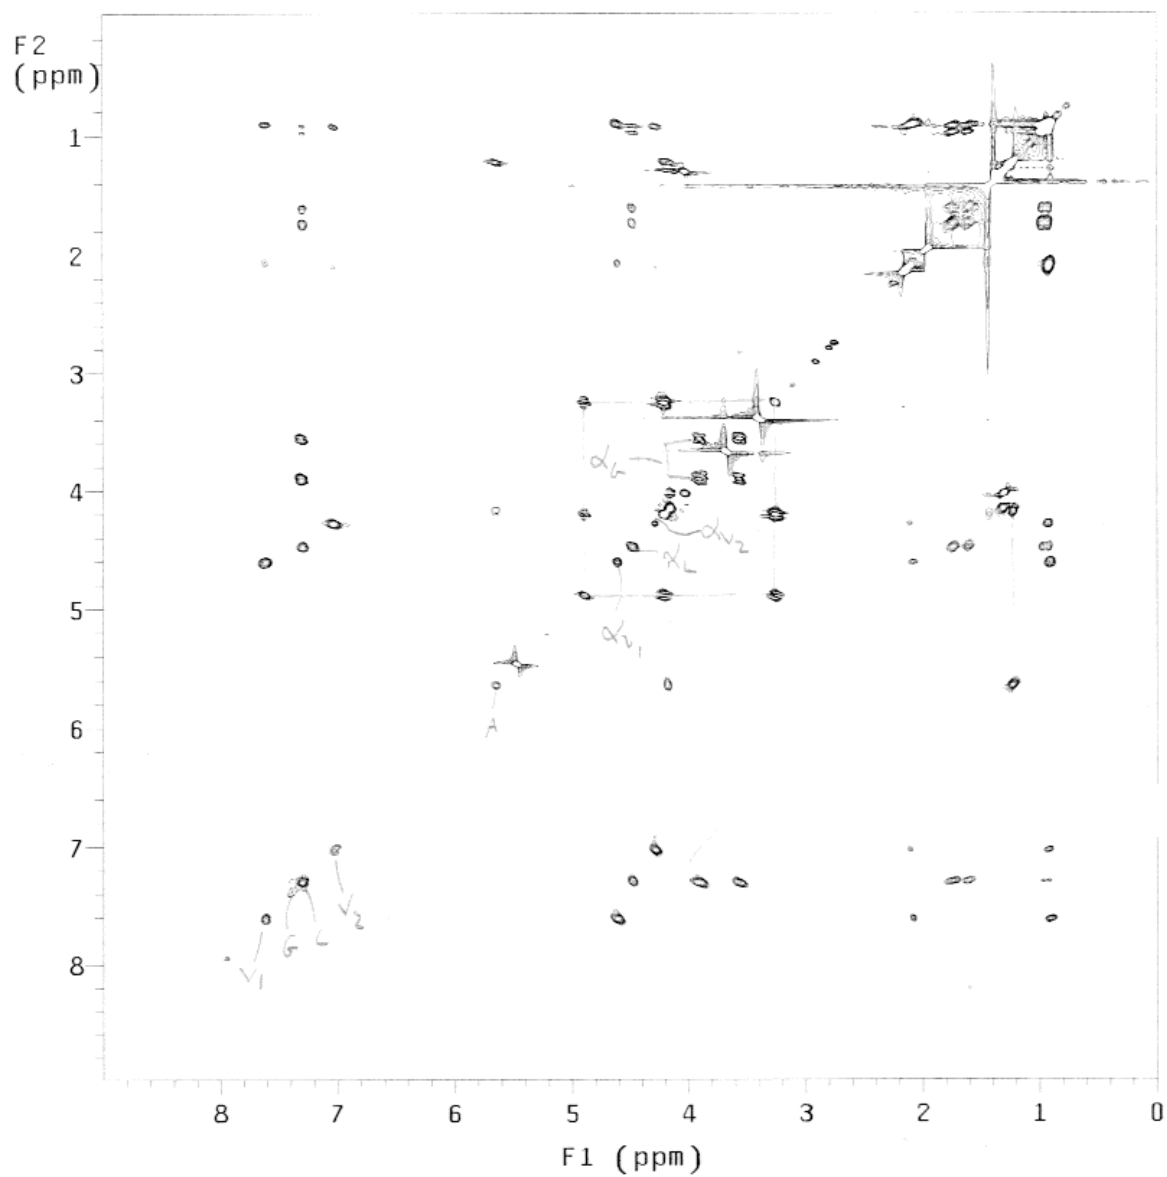



## ROESY

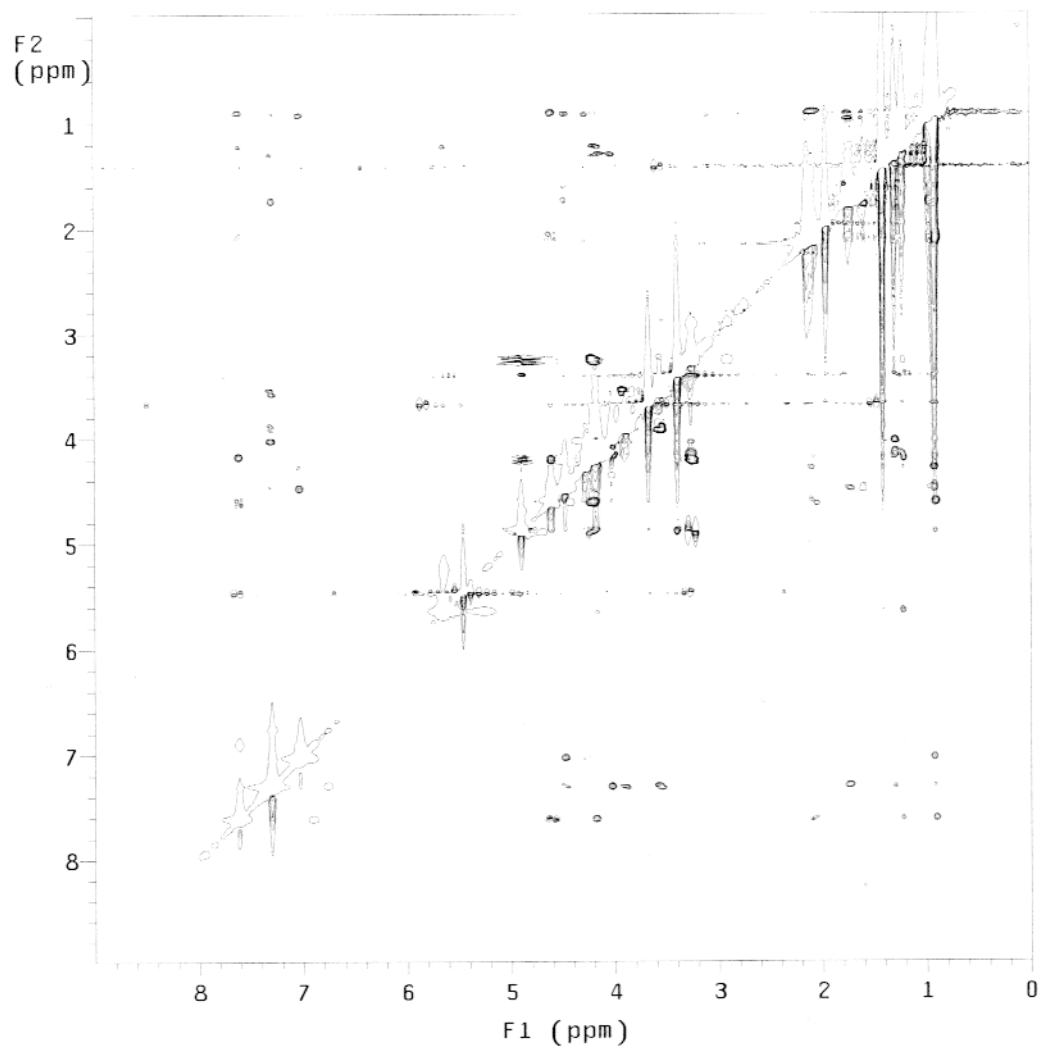

## gHSQC

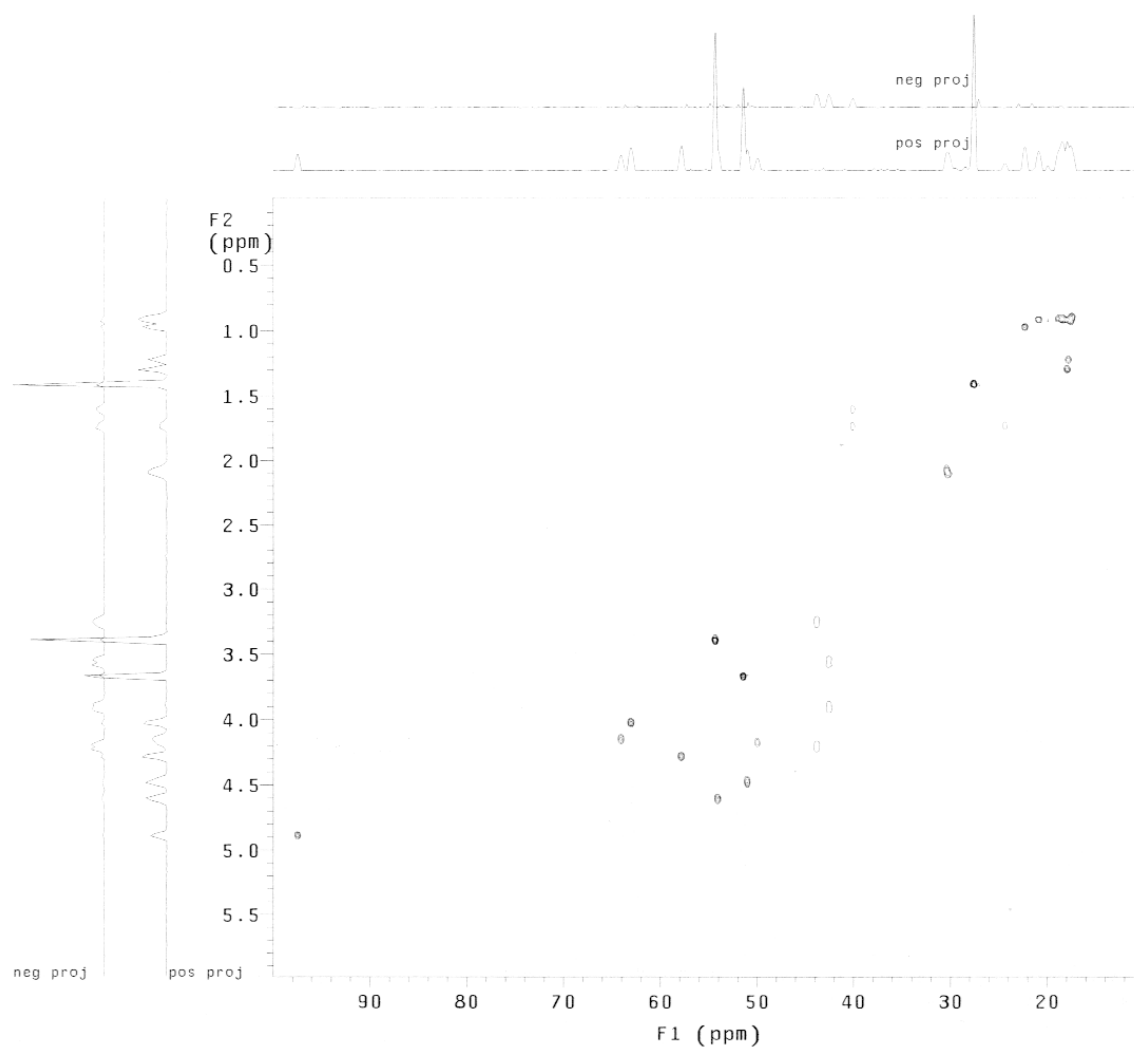

### Compound III

$^1\text{H}$  in  $\text{CD}_3\text{CN}$

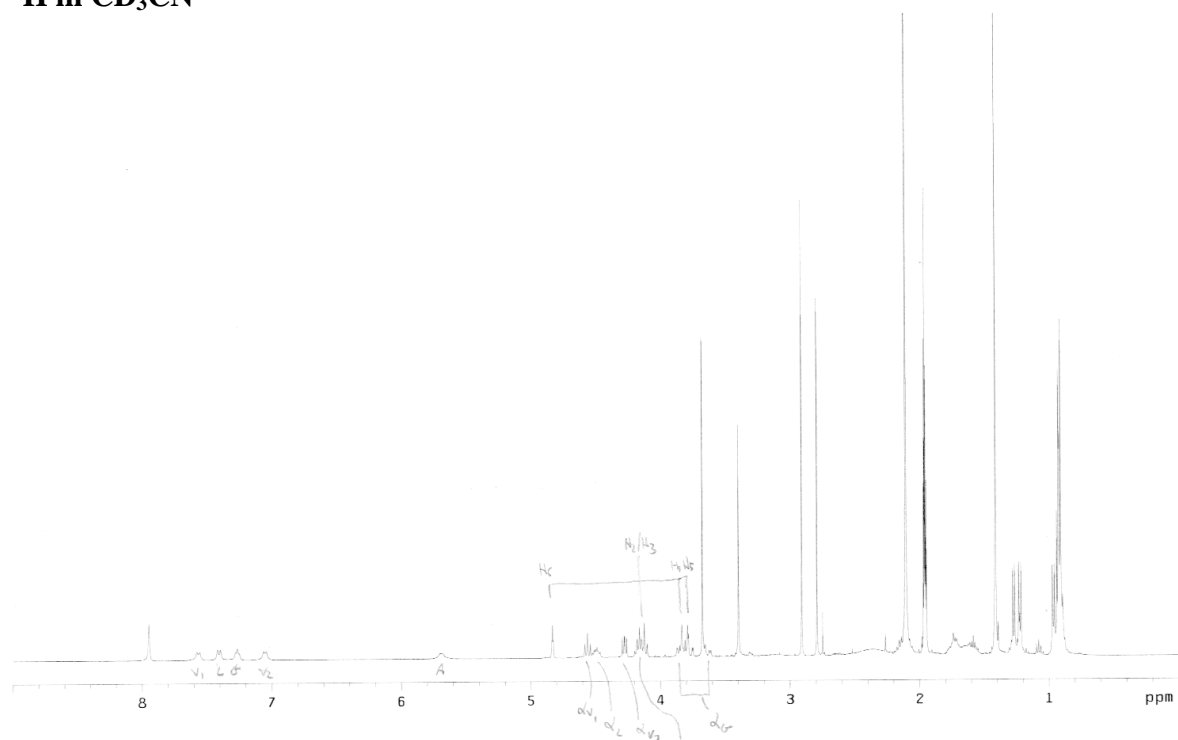

$^1\text{H}$  in  $\text{CDCl}_3$

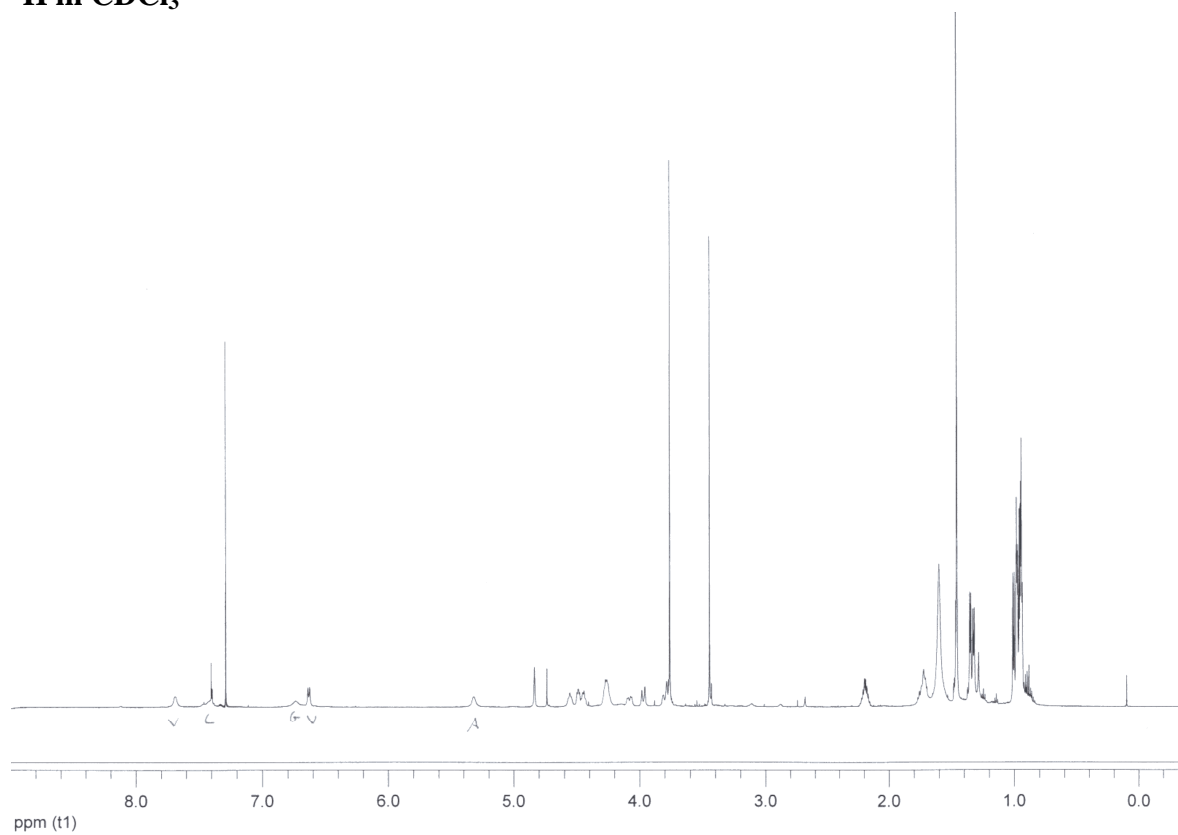

## TOCSY

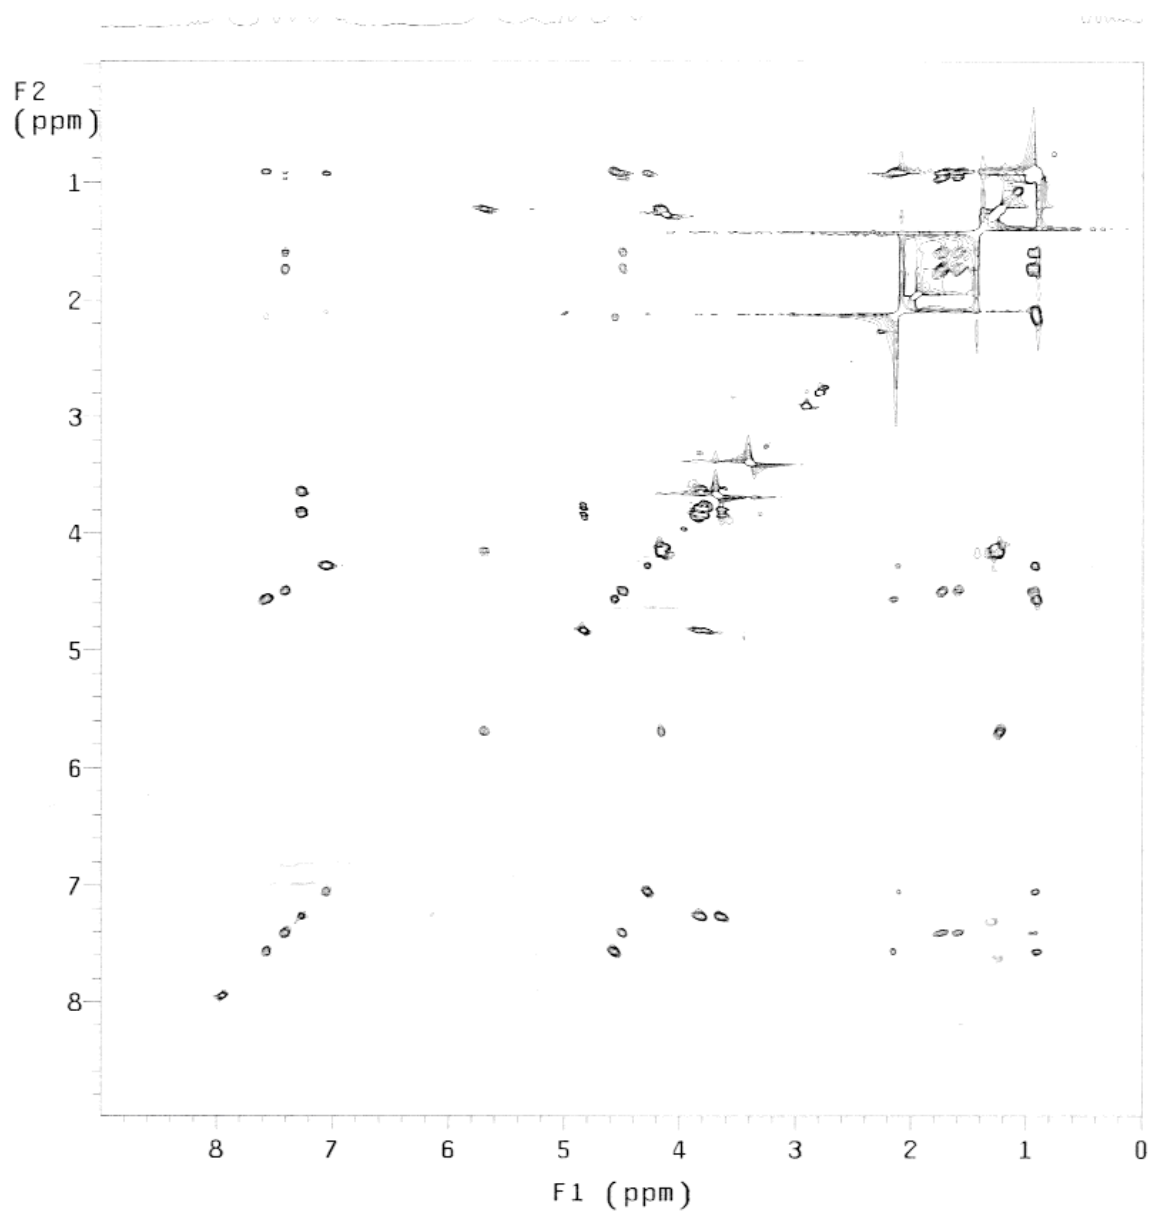

## ROESY

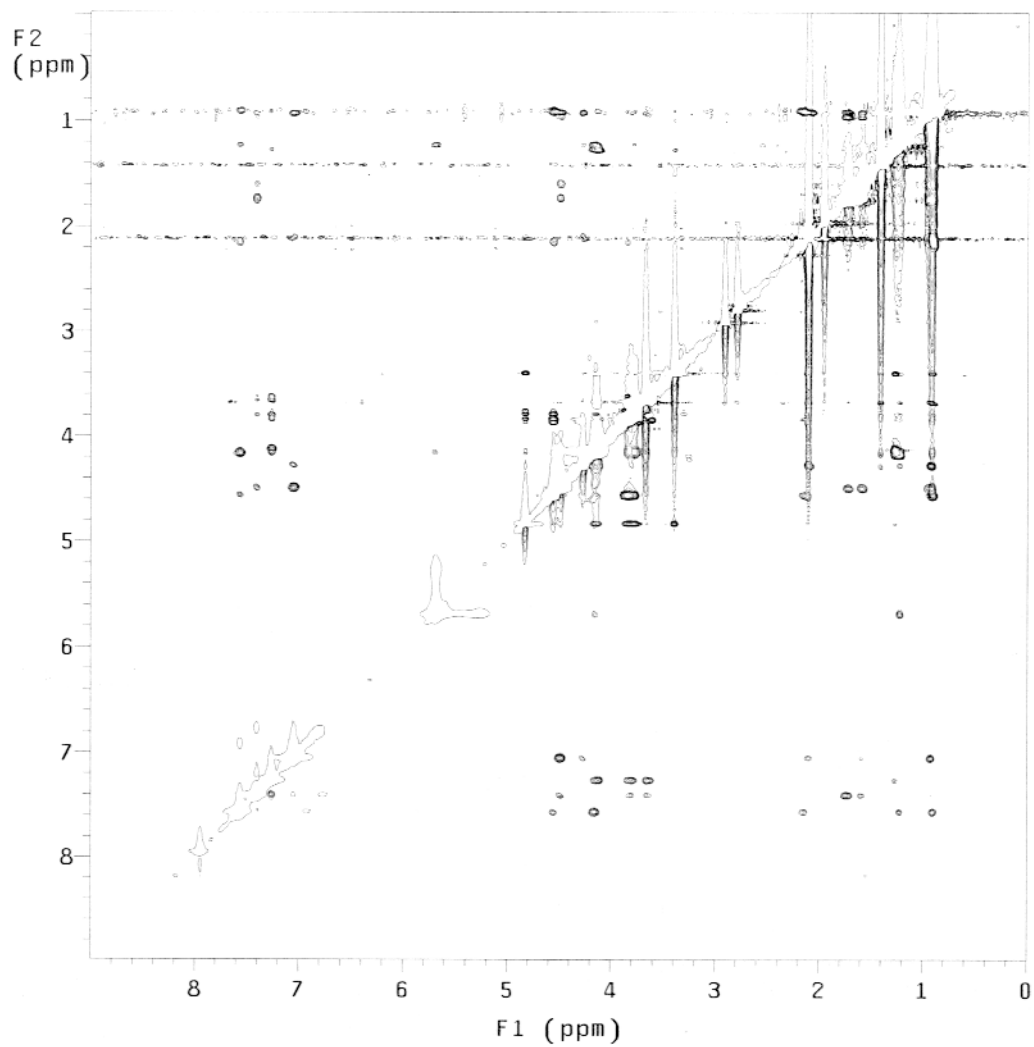

## gHSQC

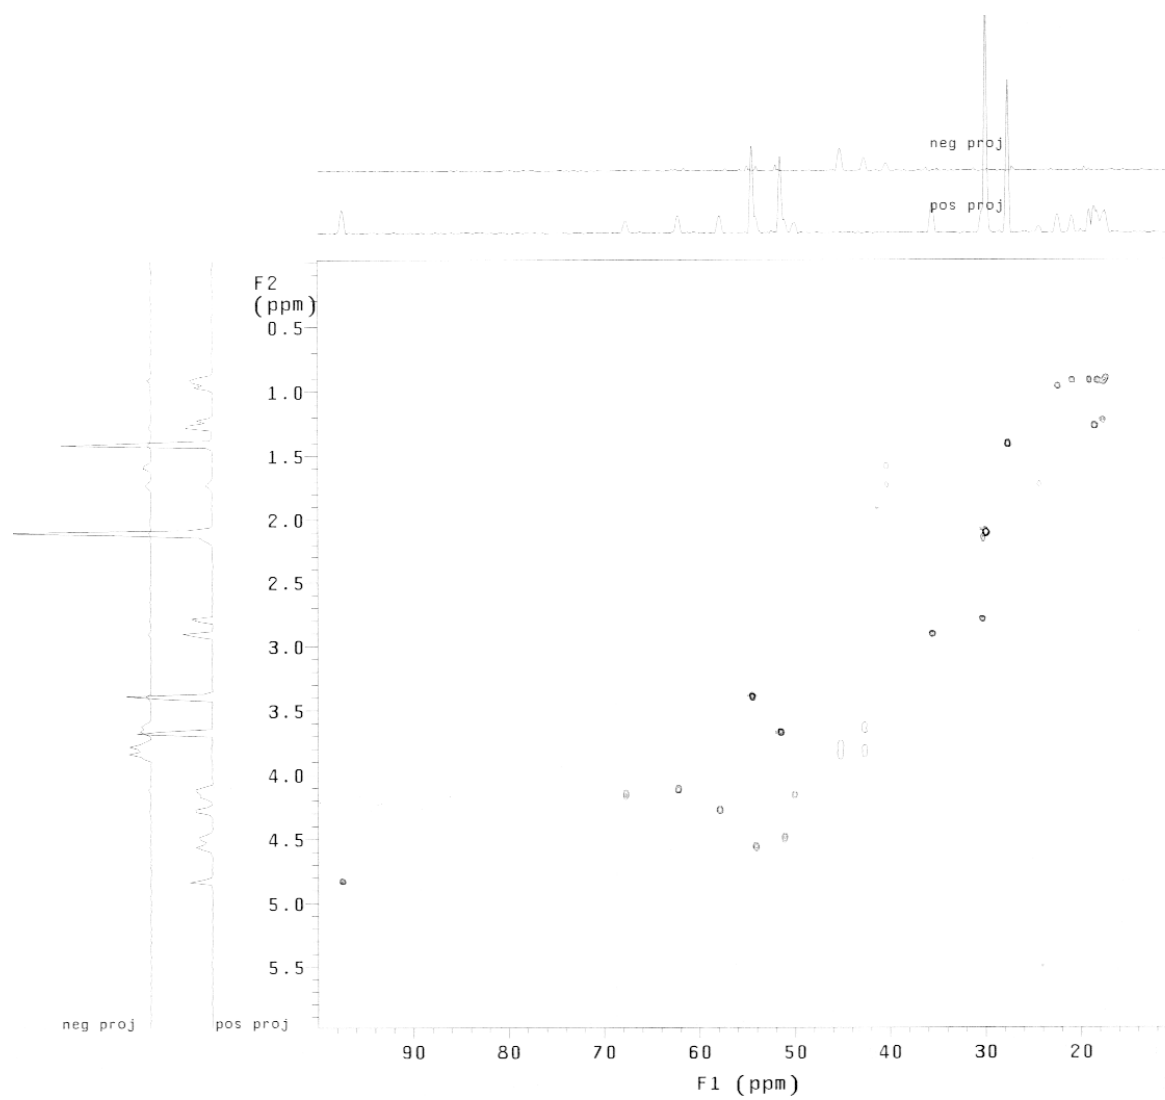

## Compound IV

$^1\text{H}$  in  $\text{CD}_3\text{CN}$

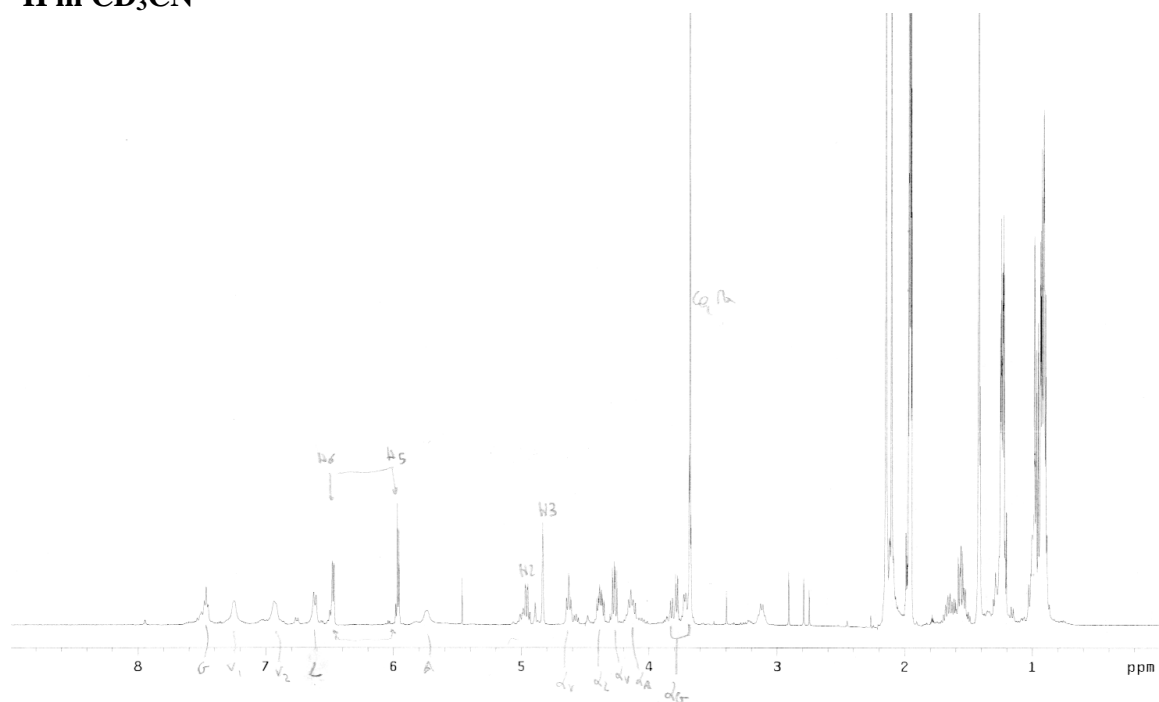

$^1\text{H}$  in  $\text{CDCl}_3$

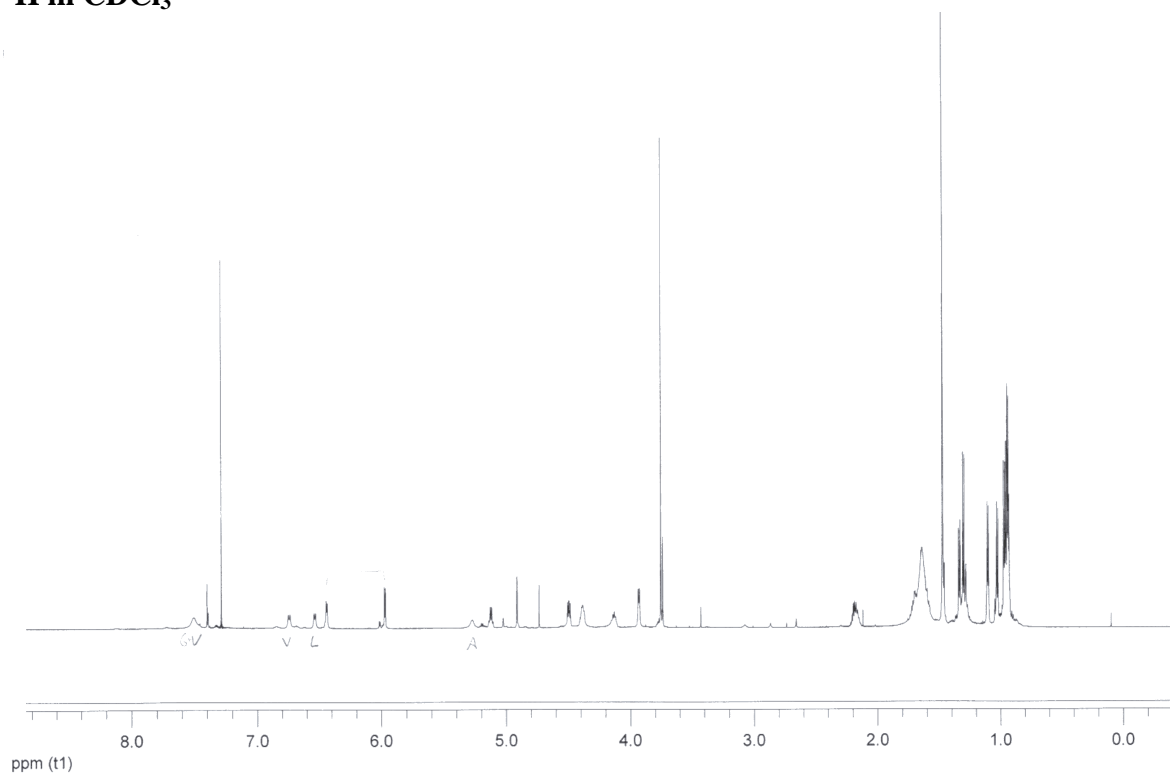

## TOCSY

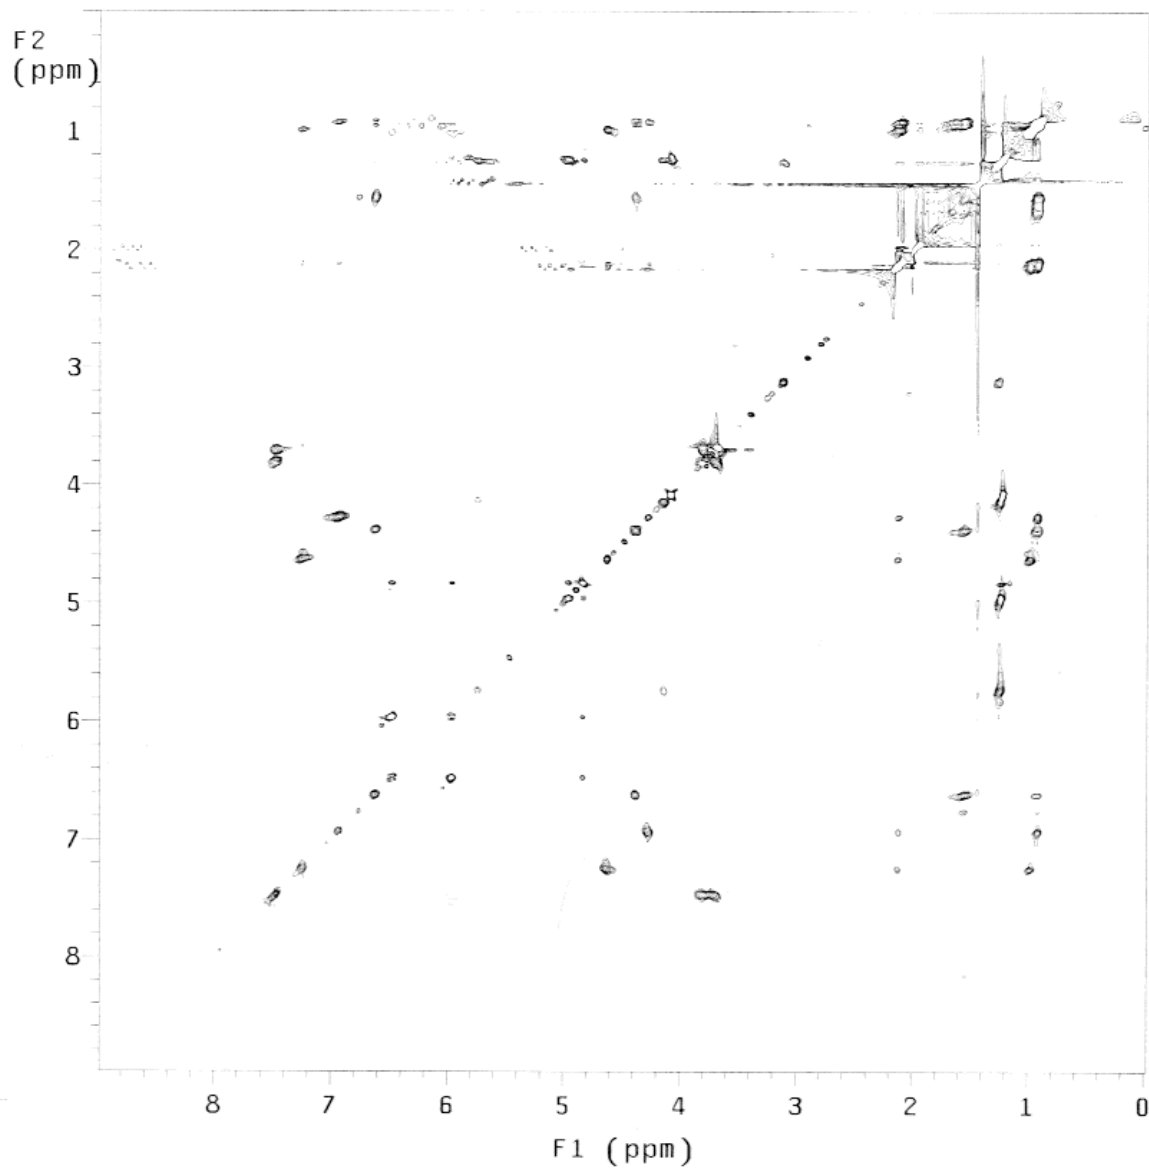



## ROESY

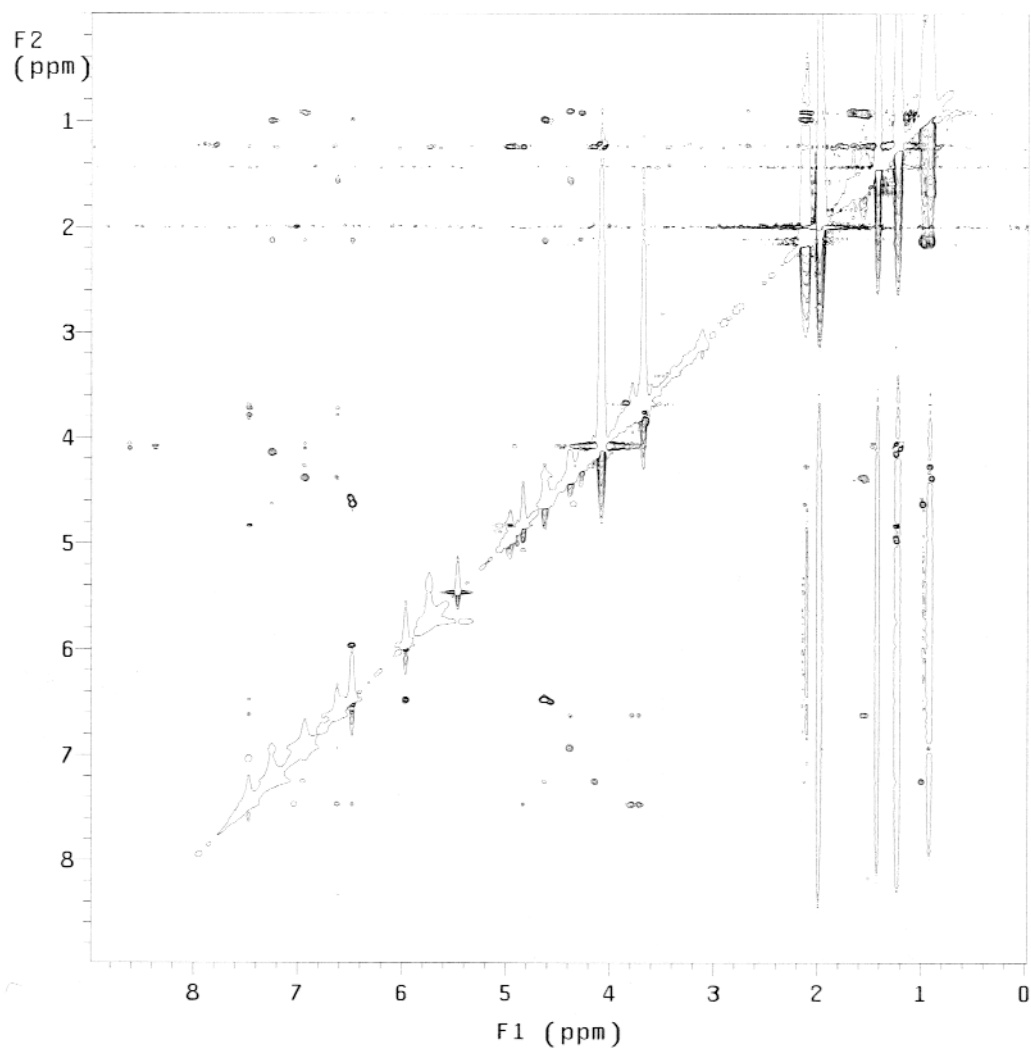

## gHSQC

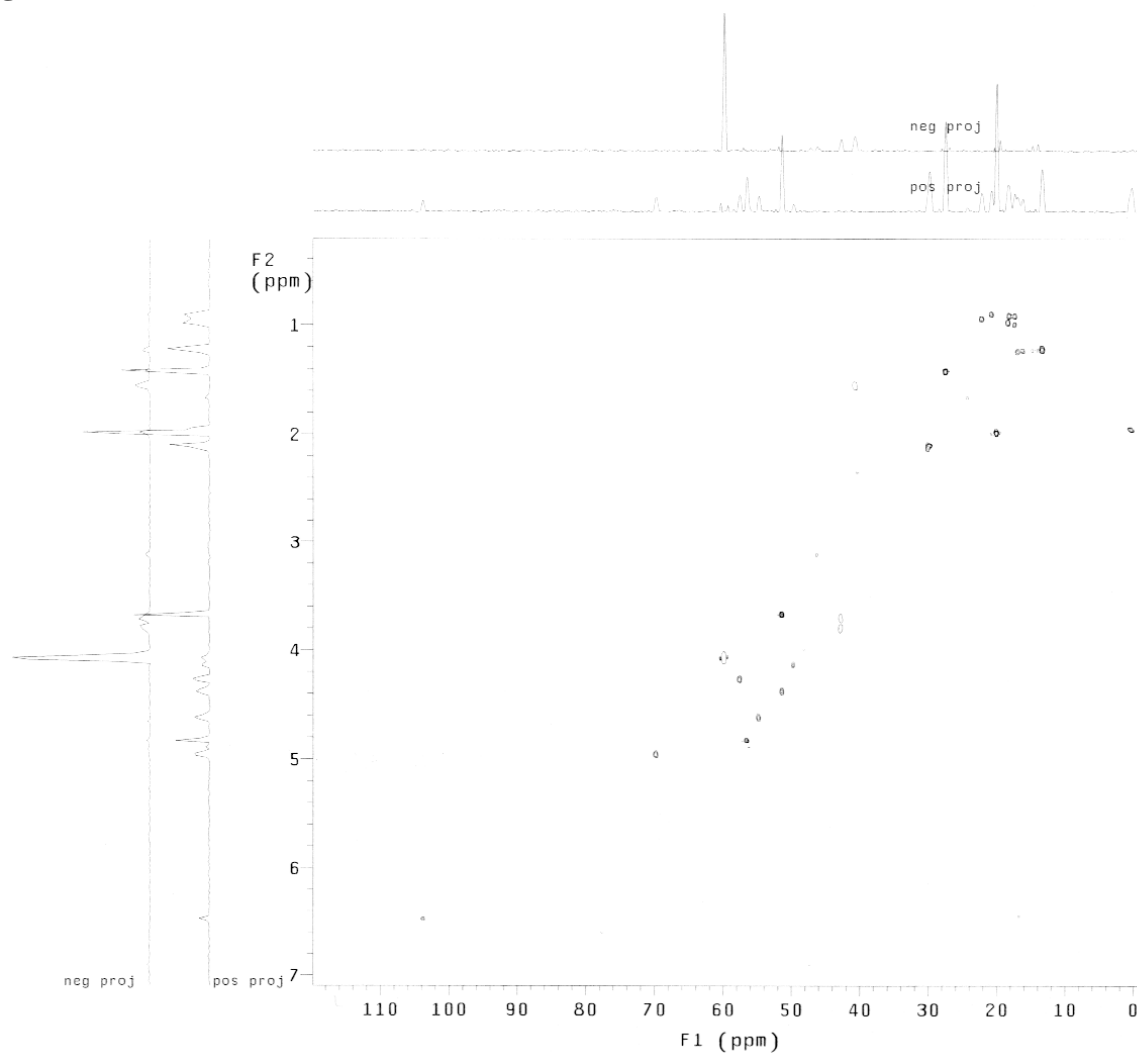

## Computational data

*Ab initio* single point calculations of the electronic properties of the most abundant minimum energy conformer at the 6-31G\*/HF level of quantum chemical theory. The axial structure is referred to the conformation having the substituents at C-2 and C-3 in axial orientation (1 a.u. = 627.5 kcal/mol).

### 4-Acetyl-2-Me-Mor-3-methylamide (scaffold I)

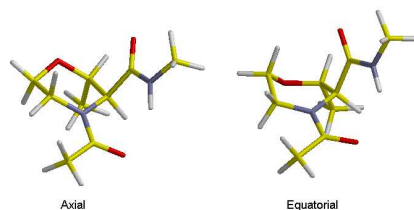

#### *Axial*

Run type: Single point energy  
Model: RHF/3-21G(\*)  
Number of shells: 74  
46 S shells  
28 SP shells  
Number of basis functions: 158  
Number of electrons: 108  
Number of heavy atoms: 14  
Number of hydrogens: 16  
Use of molecular symmetry disabled  
Molecular charge: 0  
Spin multiplicity: 1  
Memory model: direct 9.8 Mb  
Point Group = C1 Order = 1 Nsymop = 1  
This system has 84 degrees of freedom  
**E(HF) = -679.8130698 a.u.**

#### *Equatorial*

Run type: Single point energy  
Model: RHF/3-21G(\*)  
Number of shells: 74  
46 S shells  
28 SP shells  
Number of basis functions: 158  
Number of electrons: 108  
Number of heavy atoms: 14  
Number of hydrogens: 16  
Use of molecular symmetry disabled  
Molecular charge: 0  
Spin multiplicity: 1  
Memory model: direct 9.8 Mb  
Point Group = C1 Order = 1 Nsymop = 1  
This system has 84 degrees of freedom  
**E(HF) = -679.8147176 a.u.**

### 4-Acetyl-2-Me-(6S)-OMe-Mor-3-methylamide (scaffold II)

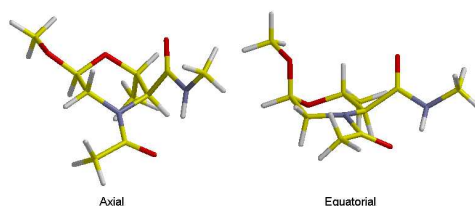

### *Axial*

Run type: Single point energy  
Model: RHF/3-21G(\*)  
Number of shells: 84  
52 S shells  
32 SP shells  
Number of basis functions: 180  
Number of electrons: 124  
Number of heavy atoms: 16  
Number of hydrogens: 18  
Use of molecular symmetry disabled  
Molecular charge: 0  
Spin multiplicity: 1  
Memory model: direct 11.8 Mb  
Point Group = C1 Order = 1 Nsymop = 1  
This system has 96 degrees of freedom  
**E(HF) = -793.0866731 a.u.**

### *Equatorial*

Run type: Single point energy  
Model: RHF/3-21G(\*)  
Number of shells: 84  
52 S shells  
32 SP shells  
Number of basis functions: 180  
Number of electrons: 124  
Number of heavy atoms: 16  
Number of hydrogens: 18  
Use of molecular symmetry disabled  
Molecular charge: 0  
Spin multiplicity: 1  
Memory model: direct 11.8 Mb  
Point Group = C1 Order = 1 Nsymop = 1  
This system has 96 degrees of freedom  
**E(HF) = -793.0767991 a.u.**

### **4-Acetyl-2-Me-(6R)-OMe-Mor-3-methylamide (scaffold III)**

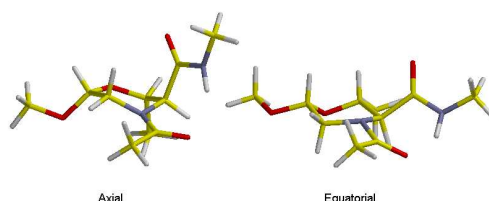

### *Axial*

Run type: Single point energy  
Model: RHF/3-21G(\*)  
Number of shells: 84  
52 S shells  
32 SP shells  
Number of basis functions: 180  
Number of electrons: 124  
Number of heavy atoms: 16  
Number of hydrogens: 18  
Use of molecular symmetry disabled  
Molecular charge: 0  
Spin multiplicity: 1  
Memory model: direct 11.8 Mb  
Point Group = C1 Order = 1 Nsymop = 1  
This system has 96 degrees of freedom  
**E(HF) = -793.0667033 a.u.**

### *Equatorial*

Run type: Single point energy  
Model: RHF/3-21G(\*)  
Number of shells: 84  
52 S shells  
32 SP shells  
Number of basis functions: 180  
Number of electrons: 124  
Number of heavy atoms: 16  
Number of hydrogens: 18  
Use of molecular symmetry disabled  
Molecular charge: 0  
Spin multiplicity: 1  
Memory model: direct 11.8 Mb  
Point Group = C1 Order = 1 Nsymop = 1  
This system has 96 degrees of freedom  
**E(HF) = -793.0771600 a.u.**

#### 4-Acetyl-2-Me-3,4-dihydro-2H-[1,4]oxazine-3-methylamide (scaffold IV)

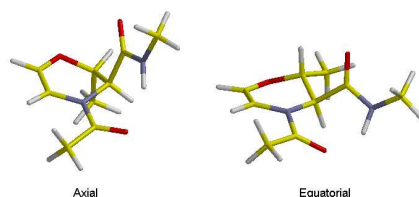

##### *Axial*

Run type: Single point energy  
Model: RHF/3-21G(\*)  
Number of shells: 70  
42 S shells  
28 SP shells  
Number of basis functions: 154  
Number of electrons: 106  
Number of heavy atoms: 14  
Number of hydrogens: 14  
Use of molecular symmetry disabled  
Molecular charge: 0  
Spin multiplicity: 1  
Memory model: direct 9.5 Mb  
Point Group = C1 Order = 1 Nsymop = 1  
This system has 78 degrees of freedom  
**E(HF) = -678.6528640 a.u.**

##### *Equatorial*

Run type: Single point energy  
Model: RHF/3-21G(\*)  
Number of shells: 70  
42 S shells  
28 SP shells  
Number of basis functions: 154  
Number of electrons: 106  
Number of heavy atoms: 14  
Number of hydrogens: 14  
Use of molecular symmetry disabled  
Molecular charge: 0  
Spin multiplicity: 1  
Memory model: direct 9.5 Mb  
Point Group = C1 Order = 1 Nsymop = 1  
This system has 78 degrees of freedom  
**E(HF) = -678.6417848 a.u.**
